# Supplementary material for: Genome-wide identification and characterization of novel genes involved in terpenoid biosynthesis in Salvia miltiorrhiza
Source: PubMed Central journal article supplement — J Exp Bot. 2012 Jan 30;63(7):2809–23. doi: 10.1093/jxb/err466 (PMC3346237; doi:10.1093/jxb/err466), 2012-01-30
Supplement: supp_err466_00072447-file001.pdf [file supp_err466_00072447-file001.pdf]

**Supplemental data for: Journal of Experimental Botany**

**Genome-wide identification and characterization of novel genes  
involved in terpenoid biosynthesis in *Salvia miltiorrhiza***

**Yimian Ma, Lichai Yuan, Bin Wu, Xian'en Li, Shilin Chen, Shanfa Lu**

Institute of Medicinal Plant Development, Chinese Academy of Medical Sciences & Peking Union

Medical College, No.151, Malianwa North Road, Haidian District, Beijing 100193, China

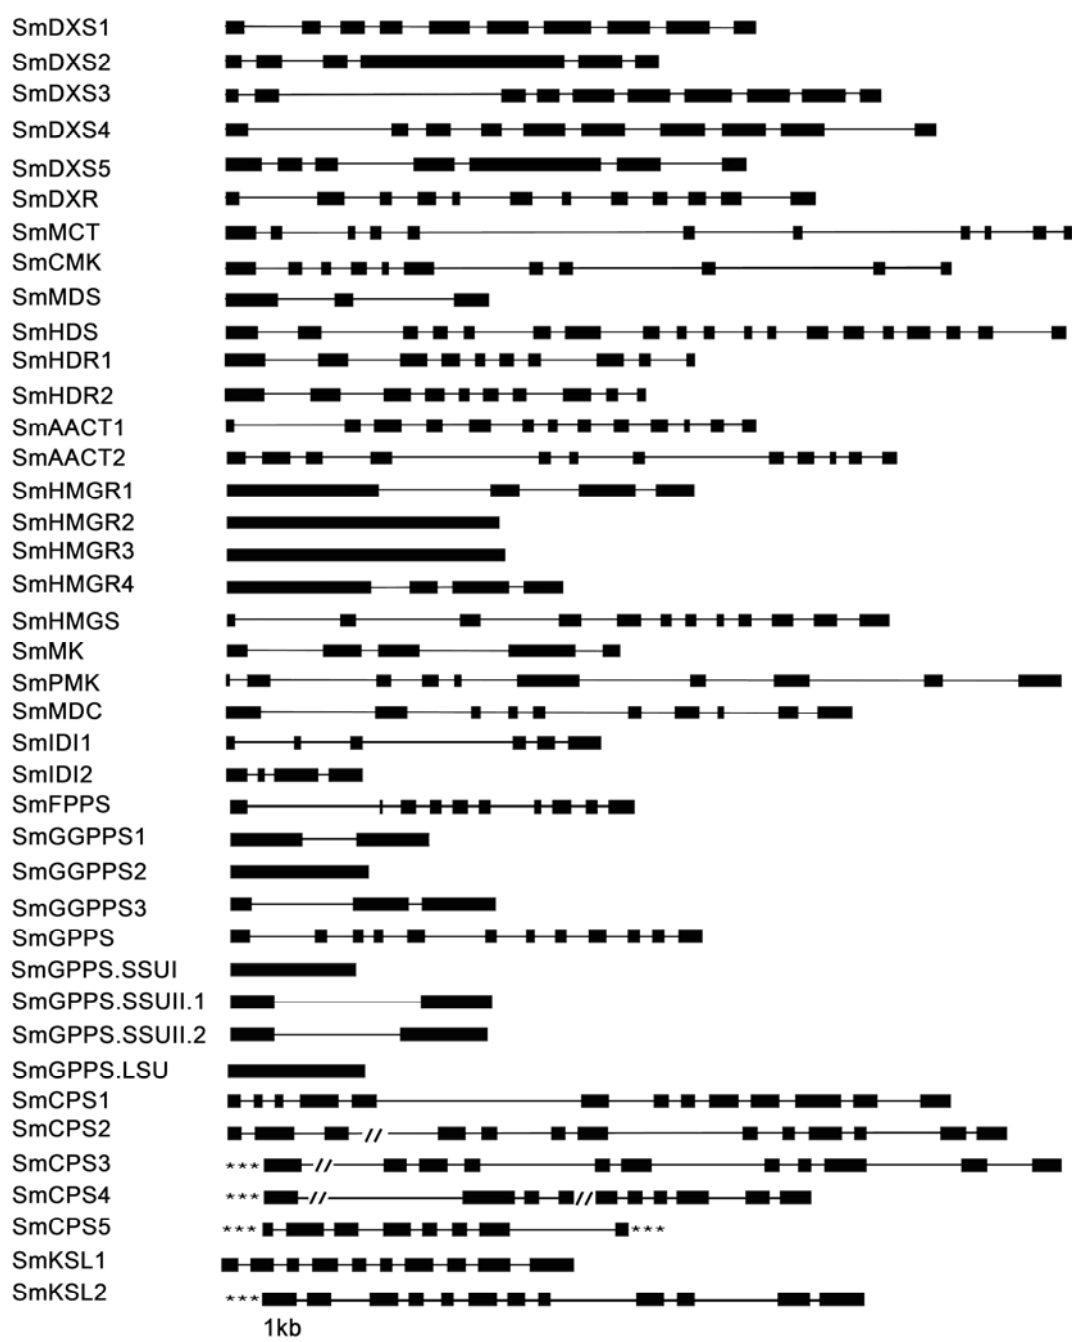

**Figure S1. Exon/intron Structures of forty terpenoid biosynthesis-related genes.** Heavy black lines represent exons. Thin black lines represent introns. Unknown sequences in the 5' or 3' regions of *SmCPS3*, *SmCPS4*, *SmCPS5* and *SmKSL2* are indicated by '\*\*\*', whereas unknown sequences in introns are indicated by '//'.

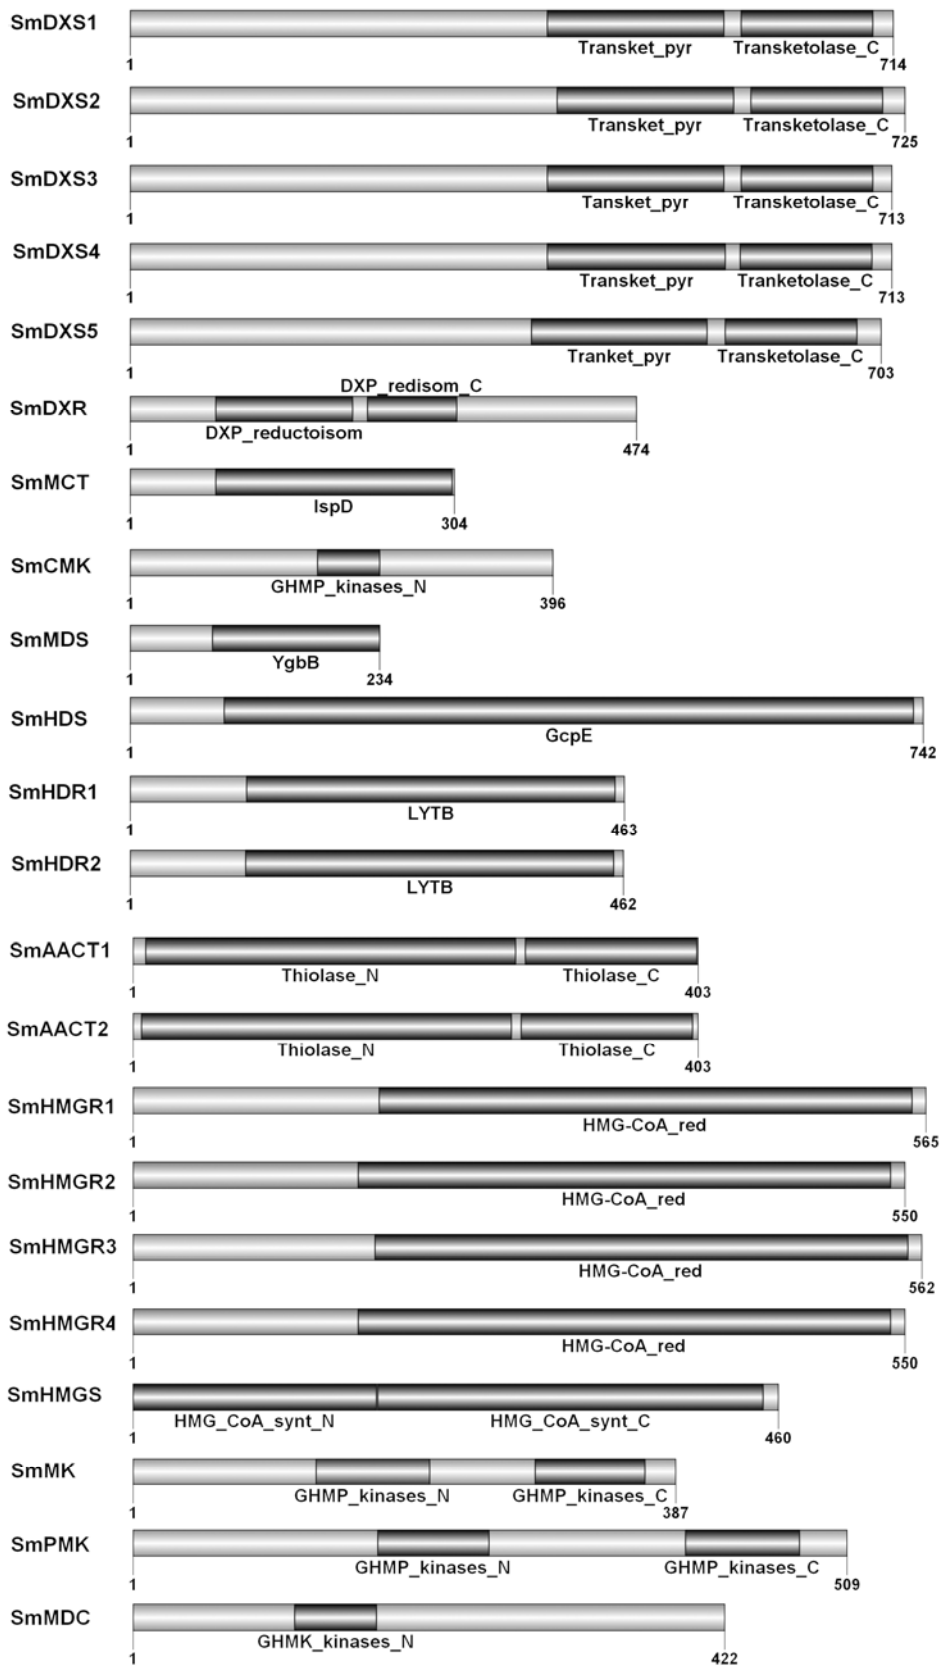

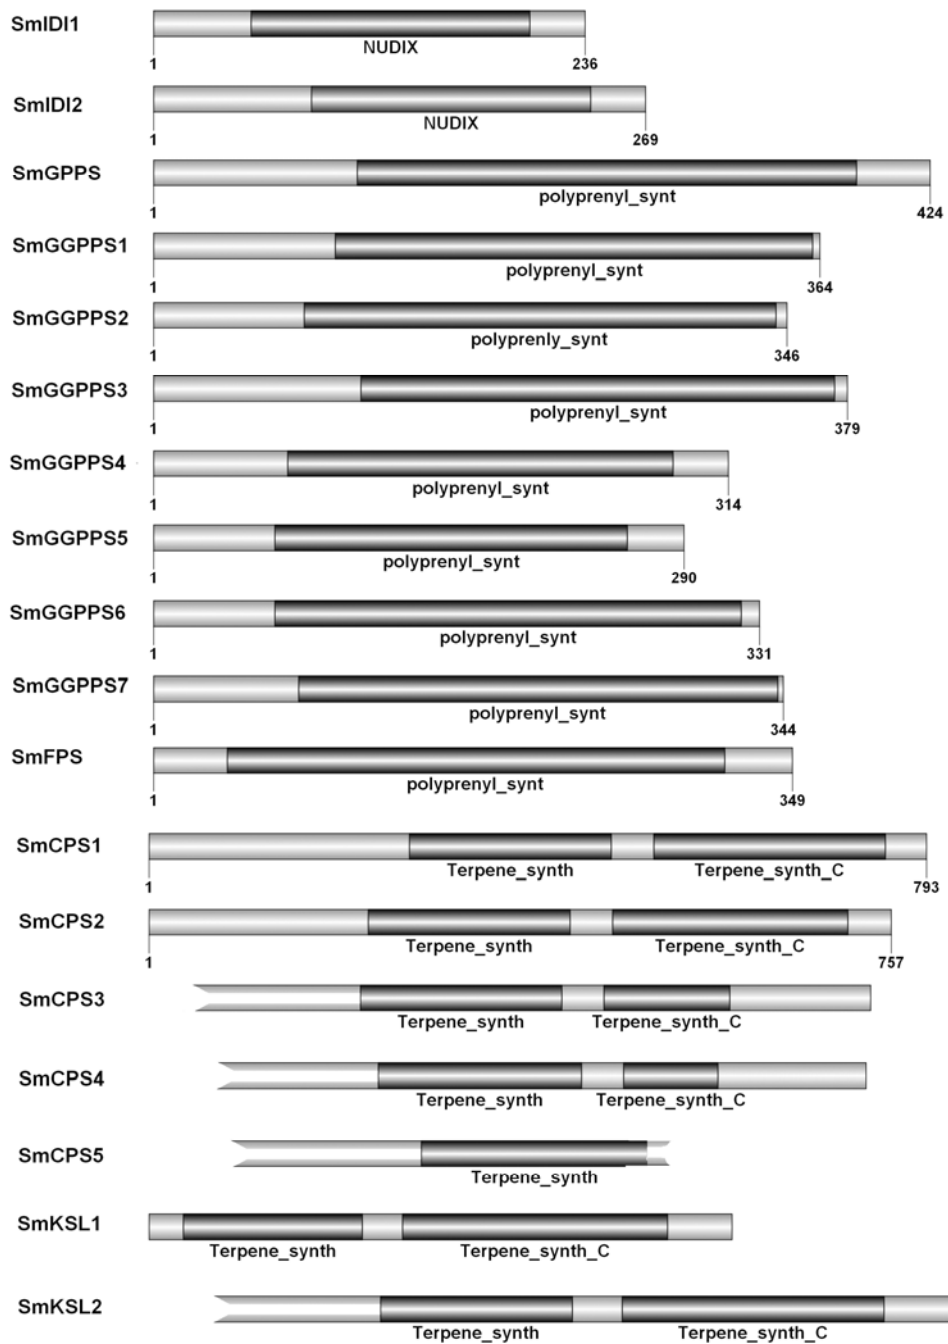

**Figure S2. Conserved domains (black boxes) of enzymes involved in terpenoid biosynthesis in *S. miltiorrhiza*.** Conserved domains were predicated by searching Pfam HMMs. Names of conserved domains are shown below the black boxes.

```

(1) 1 10 20 30 40 55
AtDXS1 (1) ---M A S S A F A F P S Y I I T K G G L S T D S C K S T S L S S S R S L V T D L P S F C L K P N N N S H S N
AtDXS2 (1) ---M A L S V F A F P S Y I N R N -----P-----S-----L K Y L K F S S M S S T K
PiDXS1 (1) -----M A L S A F S L P A H V N S V T R E V H V K
SmDXS1 (1) ---M A L C P F A F S G S L V A A D -----A Q K H T N F C S Q W L H G A D L F P H F P F C K
SmDXS5 (1) ---M A L N T L S F C G S L R K G -----V G S D A H S N R L H G V D Q Q C H F S F K
PiDXS2A (1) ---M K I G S I F Q F F L R A S V S N S -----E D C E E S K -----
SmDXS3 (1) ---M A V S G I F M C L N Q P T L F K S G A P ---K L N H A G R K H T L C V K A C R G S S E S E D G
PiDXS2B (1) -----
SmDXS2 (1) M A S S C G V I N S S F L P L L H S E D S S S L L S R T T A T L P L K K H K F S V V A A L Q Q D N T N D V A A
AtDXS3 (1) ---M G S A S I G Y Q F G I S A R F Y G - N F N L S S D I T V S S L P C K L D V S I K S L F S A P S S T H K
PiDXS3 (1) -----
SmDXS4 (1) ---M A A S S C Q N P F R I S A N L V G S S R F L L P K V E L S V V N F P P N V F S R L G F Y R S L T C K
Consensus (1) M A A I L K

```

```

(56) 56 70 80 90 100 110
AtDXS1 (53) R R -----A K V C A S L A E K G E Y Y - S N R P P T P L D T I N Y P I H M K N L S V K E L K Q L S D E
AtDXS2 (31) Y S -----K V R A T T F S E K G E Y Y - S N R P P T P L D T I N H P M H M K N L S I K E L K V L S D E
PiDXS1 (23) K R -----P N G V C A S L S E S G E F F - S Q R P P T P L D T V N Y P I H M K N L S I K E L K Q L A D E
SmDXS1 (41) N S Q I R K S S T G I C A T L S E R G E Y F - S Q K P P T P L D T I N Y P I H M K N L S T K E L Q Q L A D E
SmDXS5 (38) A K -----R S S S G I C A S S S K R G E Y F - S E K P P T P L D S I N Y P N H M K N L S L K E L Q Q L A D E
PiDXS2A (26) -----V V K K A E D G W K I D F S S G E K P S T P L D T I D Y P F H M D N L S T Q D L E Q L A S E
SmDXS3 (47) K M -----A I R K E K D G W S I D F S - G E K P A T P M L D T I N H P I H M K N L S K K E L E Q L A A E
PiDXS2B (1) -----L N F T - G N K P S T P V L D T I N H P I H M K N L S V Q E L D N L V D E
SmDXS2 (56) N G -----E S L M R Q K S R A L N F T - G D K P P T P L D T I N Y P N H M K N L S V E E L E R L A D E
AtDXS3 (52) E Y S N -----R A R V C S L P N T D G Y C D E K F E T P I L D S L E T P L O L K N L S V K E L K L L A D E
PiDXS3 (1) -----A L P D I D D I F S D L I A T P E L D V V E N P I L K N L I K E L K L L A S E
SmDXS4 (53) E Y G -----G H V H C S N T D G A V N E E A L T E T L D M V D N P M N L K N L S L K E L K Q L A D E
Consensus (56) S D F S E K P P T P L D T I N Y P I H M K N L S V K E L K Q L A D E

```

```

(111) 111 120 130 140 150 165
AtDXS1 (101) I R S D V I F - N V S K T G G H L G S S L G V V E L T V A H Y I F N T P O D K I L W D V G H Q S Y P H K I L
AtDXS2 (79) I R S D V I F - N V S K T G G H L G S N L G V V E L T V A H Y I F N T P H K I L W D V G H Q S Y P H K I L
PiDXS1 (72) I R S D V I F - N V S K T G G H L G S S L G V V E L T V A H Y V F N S P O D K I L W D V G H Q A Y P H K I L
SmDXS1 (95) I R S D V I F - N V S K T G G H L G S S L G V I E L T V A H Y V F N A P O D R I L W D V G H Q A Y P H K I L
SmDXS5 (89) I R S D L I F - N V S K T G G H L G S G L G V I E L T V A H Y V F E A P O D R I L W D V G H Q S Y P H K I L
PiDXS2A (73) I R A D I V Y - S V A K T G G H L S S L G V V E L S V A L H H V F N T P E D K I I W D V G H Q A Y P H K I L
SmDXS3 (95) I R V E I V H - T V A K T G G H L S S L G V V E L T V A L H H V F N T P H D K I I W D V G H Q A Y P H K I L
PiDXS2B (37) I R E E I V Y - T V S K T G G H L S S L G V A E L T V A L H H V F N T P E D K I I W D V G H Q A Y P H K I L
SmDXS2 (104) I R E E I V Y - T V S K T G G H L S S L G V S E L T V A L H H V F N T P E D K I I W D V G H Q A Y P H K I L
AtDXS3 (102) I R T E L H S V L W K K T Q K S M N P F A A I E L T L A H Y V F R A P V D N I L W D A V E Q T Y A H K V L
PiDXS3 (42) I R S E L S S - I M K T Q N D I K A S L A V V E L T V A L H H V F H A P V D K I L W D V G E Q T Y A H K I L
SmDXS4 (101) I R T E L S - I M K T N K S F R P S L S V V E L A V A L H H V F H A P V D K I L W D M E D Q T Y A H K I L
Consensus (111) I R S D I I F V S K T G G H L S S L G V V E L T V A L H H V F N T P D K I L W D V G H Q A Y P H K I L

```

```

(166) 166 180 190 200 210 220
AtDXS1 (155) T G R R G K M P T M R Q T N G L S G F T K R G E S E H D C F G T G H S S T T I S A G L G M A V G R D L K G K N
AtDXS2 (133) T G R R G K M K T I R Q T N G L S G Y T K R R E S E H D S F G T G H S S T T I S A G L G M A V G R D L K G M N
PiDXS1 (126) T G R R D K M H T I R Q T N G L A G F T K R S E S E Y D C F G T G H S S T T I S A G L G M A V G R D L K G R A
SmDXS1 (149) T G R R D R M P S L R Q T G G L S G F T K R S E S D Y D C F G A G H S S T T I S A G L G M A V G R D L K G R K
SmDXS5 (143) T G R R D R M P T L R Q T D G L S G F T K R S E S D Y D C F G A G H S S T T I S A G L G M A V G R D L K G R K
PiDXS2A (127) T G R R S R M H T I R Q T S G L A G F P K R D E S V D A F G A G H S S T S I S A G L G M A V A R D L L G R S
SmDXS3 (149) T G R R S K M H T I R Q T S G L A G F P K R D E S V H D A F G V G H S S T S I S A G L G M A V A R D L L G K D
PiDXS2B (91) T G R R S R M H T I R Q T F L A G F P K R E S E H D A F G A G H S S T S I S A L G M A V G R D L L G K D
SmDXS2 (158) T G R R S R M H T I R Q T F L A G F P K R D E S A H D A F G A G H S S T S I S A G L G M A V G R D L L H K N
AtDXS3 (157) T R R R M S A I P - S R O N S G I S G V T S R L E S E Y D S F G T G H G C N S I S A G L G M A V A R D M K G R R
PiDXS3 (96) T G R R S L M H T L R Q K D G L S G F T R S E S E Y D P F G A G H G C N S I S A G I G M A I A R D I K G K R
SmDXS4 (154) T G R R A C L N K S G V D D L S Y A C R N - E Y D P F G A G H G C S I S S G I G M A V A R D I K G K R
Consensus (166) T G R R S R M H T I R Q T G L S G F T K R E S E Y D A F G A G H S S T S I S A G L G M A V G R D L K G K

```

```

(221) 221 230 240 250 260 275
AtDXS1 (210) N N V V A V I G D G A M T A G Q Y E A M N N A G Y L D S N M I V I L N D N K Q V S L P T A T L D G P S P P V
AtDXS2 (188) N S V V S V I G D G A M T A G Q Y E A M N N A G Y L H S N M I V I L N D N K Q V S L P T A N L D G P T Q P V
PiDXS1 (181) N N V V A V I G D G A M T A G Q Y E A M N N A G Y L D S N M I V I L N D N K Q V S L P T A N L D G P I P P V
SmDXS1 (204) N N V V A V I G D G A M T A G Q Y E A M N N A G Y L D S N M I V I L N D N K Q V S L P T A N L D G P T A P V
SmDXS5 (198) N H V V A V I G D G A M T A G Q Y E A M N N A G Y L D S N M I V I L N D N K Q V S L P T A T L D G P S P P V
PiDXS2A (182) N H V I S V I G D G A M T A G Q Y E A M N N A G L D S N I I V I L N D N K Q V S L P T A T L D G P A T P V
SmDXS3 (204) N S V V S V I G D G A M T A G Q Y E A M N N A G L D S N I I I V L N D N K Q V S L P T A T L D G P A T P V
PiDXS2B (146) N H V I V I G D G A M T A G Q Y E A M N N A G Y L D S N I I I L N D N R Q V S L P T A T V D G P A P P V
SmDXS2 (213) N H V I S V I G D G A M T A G Q Y E A L N N A G L D S N I I V I L N D N K Q V S L P T A T I D G P A P P V
AtDXS3 (211) D R I V V A V I D N V T I T A G Q Y E A M S N A G Y L D S N M I V I L N D S R H S L H P N M E E G - S K A S I
PiDXS3 (151) E R I V T V I S N G T T M A G Q V Y E A M G N A G Y L D T N M I V I L N D S R H S L H P K I E E G - S K T S I
SmDXS4 (207) D R I V S V I S N E T T M A G Q V Y E A M S N A G Y L D S N M V V I L N D R H H S S N P K L D Q A - K A S I
Consensus (221) N V V A V I G D G A M T A G Q Y E A M N N A G Y L D S N M I V I L N D N K Q V S L P T A T L D G P A P V
*****

```

```

(276) 276 290 300 310 320 330
AtDXS1 (265) G A L S S A L S R L Q S N P A L R E L R E V A K G M T K Q I G G P M H Q L A A K V D E Y A R G M I S G T G S S
AtDXS2 (243) G A L S C A L S R L Q S N -----C G M I R E T S S T
PiDXS1 (236) G A L S S A L S R L Q S N R P L R E L R E V A K G V T K Q I G G P M H L L A A K V D E Y A R G M I S G S G S T
SmDXS1 (259) G A L S S A L S R L Q S N R P L R E L R E V A K G V T K Q I G G P M H L L A A K V D E Y A R G L I S G S G S T
SmDXS5 (253) G A L S R A L S R L Q S N R P L R E L G E A S K -----G G S M H L L A A K -----H G R G L M S G S G S T
PiDXS2A (237) G A L S S T T K L Q A S A K F R K L H A A K G I T K Q I D G T H Q V A A K V D E Y A R G M I S A S G S T
SmDXS3 (259) G A L S S A L T K L Q A S P K F R Q L R E A A K S I T K Q I G P Q A H E V A A K V D E Y A R G M L S A S G S T
PiDXS2B (201) G A L S R A I T R L H S S R K F R Q L R E A A K G I T K Q I G G Q T O E I A A K V D S Y M R G M T G A S G A C
SmDXS2 (268) G A L S K A I T R L Q A S R K F R Q L R E A A K G M T R O M G E O A H E I A S K V D T Y M K G M M G K P G A S
AtDXS3 (265) S A L S I M S K I Q S S K V F R K F R E L A K A M T K R I G K G M Y E W A A K V D E Y A R G M V G P T G S T
PiDXS3 (205) T A L S S T L S K L Q S S K S F R R L R E V A K G V T K R I G - - M H L L A A K V D E Y A R G M M G P L G S T
SmDXS4 (261) N A V S T L S K L Q S S Q F R K F R E V A K V L T K R I G R M H E W A A K T D E Y A R G M V G P P G S T
Consensus (276) G A L S S A L S R L Q S S R F R L R E V A K G I T K Q I G G M H E L A A K V D E Y A R G M I S G S G S T

```

(331) 331 340 350 360 370 385  
AtDXS1 (320) LFEELGLLYYIGPVDGHNIDDLVAIKLVKSTRRTTGPVLIHVVTEKGRGYPYAERA  
AtDXS2 (266) LFEELGLFHYIGPVDGHNIDDLVSILETLKSTKTTGPVLIHVVTEKGRGYPYAERA  
PtDXS1 (291) LFEELGLLYYIGPVDGHNIDDLTAIKLVKSTKTTGPVLIHVVTEKGRGYPYAERA  
SmDXS1 (314) LFEELGLLYYIGPVDGHNLDLDTAIREVKSTKTTGPVLIHVVTEKGRGYPYAERA  
SmDXS5 (299) LFEELGLLYYIGPVDGHNIDDLTIIARVKNTKITGPVLIHVVTEKGRGYPYAERA  
PtDXS2A (292) LFEELGLLYYIGPVDGHSIEDLVTFQNVKAMPAPGPVLIHVIITEKKGKGYPAEAAA  
SmDXS3 (314) LFEELGLLYYIGPVDGHNIDDLVTFQKVKAMPAPGPVLIHVIITEKKGKGYPAEAAA  
PtDXS2B (256) LFEELGLLYYIGPVDGHNVEDLVLDLKKVKAMPAPGPVLIHVIITEKKGKGYPAEVA  
SmDXS2 (323) LFEELGLLYYIGPVDGHNVEDLVYFKKVKAMPAPGPVLIHVIITEKKGKGYPAEVA  
AtDXS3 (320) LFEELGLLYYIGPVDGHNIEDLVCFREVSLLDSMGPVLVHVITE-----GN---  
PtDXS3 (258) LFEELGLLYYIGPVDGHNIGELVCFQEVSLDSMGPVLVHVITEENQCTEYKQPS  
SmDXS4 (316) LFEELGLLYYIGPVDGHNIEDLVCFHEVASLDSMGPVLVHVVTKEEYAVEDNQMG  
Consensus (331) LFEELGLLYYIGPVDGHNIDDLV ILKVKSM T GPVLIHVVTEKGRGYPYAE A

(386) 386 400 410 420 430 440  
AtDXS1 (375) DDKYHGKVKFDPATGKQFKNISKTQSYTTFYFAEALIAEAEVDKDIVVAIHAAMGG  
AtDXS2 (321) DDKYHGKVKFDPETGKQFKNISKTQSYTSCFVEALIAEAEADKDIVVAIHAAMGG  
PtDXS1 (346) ADKYHGKVKFDPATGKQKASASATQSYTTFYFAEALIAEAEADKDIVVAIHAAMGG  
SmDXS1 (369) ADKYHGKVKFDPATGKQKSSAPTQSYTTFYFAEALIAEAEVDKDIVVAIHAAMGG  
SmDXS5 (354) ADKYHGKVKFDPATGKQKANARATQSYTTCFARALIAEAEADKDIVVAIHAAMGG  
PtDXS2A (347) ADKMHGKVKFDPVKS-GQKFLKSSLSYTRTFYFAEALIAEAEVDKDIVVAIHAAMGG  
SmDXS3 (369) ADRMHGKVKFDPCTGKONRAKSSLSYTONFABSLIREAEDSKDIVVAIHAAMGG  
PtDXS2B (311) ADKMHGKVKFDPKTKGKQLKSKNSLSYTONFABSLIAEAEADKDIVVAIHAAMGG  
SmDXS2 (378) ADKMHGKVKFDPETGKQKSKNTKSYTTFYFAEALIAEAEHDDRIVVAIHAAMGG  
AtDXS3 (366) -----RDAET-VKNIMVKDR-RTYSDCFVEALVMEAEKDRDIVVHAGMEM  
PtDXS3 (313) EAMENQEGELSSFDNELLYSMHARTYSDCFVEALVMEAEKDRDIVVHAGMEM  
SmDXS4 (371) KVS--EECEGPFETIEAAPRSRPTYSDFHAKALITEABIDEDIVVHAGMEM  
Consensus (386) ADK HGKVKFDP T GKQ KAKS TQSYT YFAEALIAEAE DKDIVVAIHAAMGG

(441) 441 450 460 470 480 495  
AtDXS1 (429) GTGLNLFQRRFPTRCFDVGIAEQHAVTFAAGLACBGLKPPFCAIYSSFMQRAYDQV  
AtDXS2 (375) GTMLNLFESRFPTRCFDVGIAEQHAVTFAAGLACBGLKPPFCAIYSSFMQRAYDQV  
PtDXS1 (400) GTGLNLFRRFPTRCFDVGIAEQHAVTFAAGLACBGLKPPFCAIYSSFLILLYDN  
SmDXS1 (423) GTGLNLFQRRFPTRCFDVGIAEQHAVTFAAGLACBGLKPPFCAIYSSFLQRGYDQV  
SmDXS5 (408) GTGLNLFNHRFPTRCFDVGIAEQHAVTFAAGLACBGLKPPFCAIYSSFMQRAYDQV  
PtDXS2A (401) GTGLNLYFQKRFPPDRCFDVGIAEQHAVTFAAGLATBGLKPPFCAIYSSFLQRGYDQV  
SmDXS3 (423) GTGLNLYFQKRFPPDRCFDVGIAEQHAVTFAAGLATBGLKPPFCAIYSSFLQRGYDQV  
PtDXS2B (365) GTGLNLYFQKRFPPDRCFDVGIAEQHAVTFAAGLATBGLKPPFCAIYSSFLQRGYDQV  
SmDXS2 (432) GTGLNLYFQKRFPPDRCFDVGIAEQHAVTFAAGLATBGLKPPFCAIYSSFLQRGYDQV  
AtDXS3 (410) DPSFLTFQRRFPDRFENVMGMAEQHAVTFAAGLSSGGLKPPFCIIPSAFLQRAYDQV  
PtDXS3 (368) DPSFLTFQRRFPDRFELGMGMAEQHAVTFAAGLSSGGLKPPFCIIPSAFLQRAYDQV  
SmDXS4 (423) ETSFRALKDKLRDRFENVMGMAEQHAVTFAAGLACBGLKPPFCIIPSAFLQRAYDQV  
Consensus (441) GTGLNLFQKRFPPDRCFDVGIAEQHAVTFAAGLACBGLKPPFCAIYSSFLQRAYDQV

(496) 496 510 520 530 540 550  
AtDXS1 (484) VHDVDL-----OKLPVRFAMDRAGLVGADGPTHCGAFDV  
AtDXS2 (430) VHDVDL-----OKLPVRFALIDRAGLVGADGPTHCGAFDV  
PtDXS1 (455) TQQYLVGIILLPDTDSSPHVDTIINVKMKLPVRFAMDRAGLVGADGPTHCGAFDV  
SmDXS1 (478) VHDVDL-----OKLPVRFAMDRAGLVGADGPTHCGAFDV  
SmDXS5 (463) VHDVDL-----OKLPVRFAMDRAGLVGADGPTHCGAFDV  
PtDXS2A (456) VHDVDL-----OKLPVRFAMDRAGLVGADGPTHCGAFDI  
SmDXS3 (478) VHDVDL-----OKLPVRFAMDRAGLVGADGPTHCGSFDV  
PtDXS2B (420) VHDVDL-----OKLPVRFALIDRAGLVGADGPTHCGAFDT  
SmDXS2 (487) VHDVDL-----OKLPVRFMMDRAGLVGADGPTHCGAFDT  
AtDXS3 (465) VHDVDR-----QRKAVRFVITSAGLVGSDGPTVCGAFDI  
PtDXS3 (423) VHDVDR-----QRIEVRVITSAGLVGSDGPTMCGAFDI  
SmDXS4 (478) VHDVDR-----QKIVRFVFLTSAGLVGSDGATHSGAFDI  
Consensus (496) VHDVDL OKLPVRFAMDRAGLVGADGPTHCGAFDV  
\*\*\*\*\*

(551) 551 560 570 580 590 605  
AtDXS1 (518) TFMACLPNMIVMAPSDEAELFNMVATAAAIDDRPSCFRYPFRNGIGVLPENKNG  
AtDXS2 (464) TFMACLPNMIVMAPSDEAELFNMVATAAAIDDRPSCFRYHRNGIGVSLPPGNKG  
PtDXS1 (510) TFMACLPNMIVMAPSDEAELFNMVATAAAIDDRPSCFRYPFRNGIGVLPENKNG  
SmDXS1 (512) TFMACLPNMIVMAPSDEAELFNMVATAAAIDDRPSCFRYPFRNGIGVLPENKNG  
SmDXS5 (497) SFMACLPNMIVMAPSDEAELCHMVATAAAIDDRPCCFRYPFRNGIGVLPENKNG  
PtDXS2A (490) TFMACLPNMIVMAPSDEAELMNMVATAAAIDDRPSCFRYPFRNGIGVLPENKNG  
SmDXS3 (512) TFMACLPNMIVMAPSDEAELIHMVATAAAIDDRPSCFRYPFRNGIGVLPENKNG  
PtDXS2B (454) TFMACLPNMIVMAPSDETELIHMVATAAAIDDRPSCFRYPFRNGIGVLPENKNG  
SmDXS2 (521) TFMACLPNMIVMAPSDELELMHMVATAAAIDDRPSCFRYPFRNGIGVLPENKNG  
AtDXS3 (499) AFMSLPLNMIIAMAPADEDELVNMVATAAAVYVDRPVCFRFRG-SIVNMNYLVPTG  
PtDXS3 (457) TFMSCLPNMIVMAPSDEDELVDMVATAVHSDHHPICFRYPFRG-AIVGTDHYTRSG  
SmDXS4 (512) TFMSCLPNMIVMAPSDETELARMVSTAAIDDRPVCFRFRG-AIASMDENLHLR  
Consensus (551) TFMACLPNMIVMAPSDEAELIHMVATAAAIDDRPSCFRYPFRNGIGV LPP NKG  
\*\*\*\*\*

(606) 606 620 630 640 650 660  
AtDXS1 (573) VFEIIGKGRILKEGERVALLGYGSAVQSCLAGAAMLEERGLNVTVADARFCKPLD  
AtDXS2 (519) VPLQIGRGRILRDGERVALLGYGSAVQRCLEAASMLSERGLITVADARFCKPLD  
PtDXS1 (565) IPELVGKGRILKEGERVALLGYGTAVQSCLAASAALVERHGIHLTVADARFCKPLD  
SmDXS1 (567) KPELVGKGRILKEGERVALLGYGSAVQSCLAASAALVETRGLQLTVADARFCKPLD  
SmDXS5 (552) VPELVGRGRILVEGERVALLGYGAAVQSCLAASAALVETGLRLTVADARFCKPLD  
PtDXS2A (545) IALEIGKGRILMEGNRVAIMGYGSIIVQCCAEASMLRTQDTSVTVADARFCKPLD  
SmDXS3 (567) TFEIIGKGRILVEGSRVAILGYGAAVQCCIGAEAMLSYDIAPTLVADARFCKPLD  
PtDXS2B (509) TPELVGKGRILREGSRVAILGYGTIVQSCMQAAKLLLEETGISATVADARFCKPLD  
SmDXS2 (576) TPELVGKGRILKEGSRVAILGFTIVQNCCLAAALQLQEHGISVTVADARFCKPLD  
AtDXS3 (553) LPEISRS-----EEEFSS-----  
PtDXS3 (511) IFEIIGKGRILKEGKDVALLGYGEMVQNCILRAALSKLGIETVADARFCKPLD  
SmDXS4 (566) EPEIIVRGRILVEGKDIALLGFGSMVQNCILRAALSNMGIETVADARFCKPLD  
Consensus (606) IPELVGKGRILKEGERVALLGYGSAVQCLAAASALLVETGLRLTVADARFCKPLD

```

(661) 661          670          680          690          700          715
AtDXS1 (628) RA LIRSLAKSHEVLITVEEGSIGGGFGSHVVFALALDGLLDGK LKWRPMLVLPDRYI
AtDXS2 (574) VALIRSLAKSHEVLITVEEGSIGGGFGSHVVFALALDGLLDGK LK VYRTWITNGST
PtDXS1 (620) NALIRSLAKSHEVLITVEEGSIGGGFGSHVAFHFLALDGLLDGK LKWRPMLVLPDRYI
SmDXS1 (622) HALIRSLAKSHEVLITVEEGSIGGGFGSHVAFHFLALDGLLDGK LKWRPMLVLPDRYI
SmDXS5 (607) RALVRLNLRTHDALITVEEGSVGGFGSHVAFHFLALDGLLDGK LKWRPMLVLPDRYV
PtDXS2A (600) TNLIRQLAREHEILITVEEGSIGGGFGSHVSHFLSSTGILLDGP LKLRMLVLPDRYI
SmDXS3 (622) THLITRLAREHEILITVEEGSIGGGFGSHVSHFLSLNGLLDGHLKLRSMMLPDRYI
PtDXS2B (564) GELIRQLAQEHEVLITVEEGSIGGGFGSHVSHFLSLNGLLDGK LKWRPMLVLPDRYI
SmDXS2 (631) GDLTKKLVQEHHEVLITVEEGSIGGGFGSHVSHFLSLNGLLDGK LKWRPMLVLPDRYI
AtDXS3 (566) -----
PtDXS3 (566) MKLLRQLCENHAFVITVEEGSIGGGFGSHVSHFLALDGLDGR TKWRPMLVLPDRYI
SmDXS4 (621) IKLVRLNLRTHDALITVEEGSIGGGFGSHVSHFLSLNGLLDGK LKWRPMLVLPDRYI
Consensus (661) LIR LAK HEVLITVEEGSIGGGFGSHVSHFLALDGLLDG LKWRPMLVLPDRYI

(716) 716          730          740          757
AtDXS1 (683) DHGAPADQLAEAGLMESSHIAATALNLLIG--APREALF-----
AtDXS2 (629) S-----
PtDXS1 (675) DHGAPADQLAEAGLTPSHIAATVFNILG--QRKNSLEIMSS--
SmDXS1 (677) DHGAPVDQIMEAGLTPSHIAATVFNILG--KAREALEIMS--
SmDXS5 (662) DHGAPADQLTQVGLTPSCTAATIFNILGSKWSREAL E IIFRN
PtDXS2A (655) DHGSEPDQIEEAGLSSNHITATVLSMLG--KPKEALHEFK--
SmDXS3 (677) DHGAPQDQIEEAGLTSRHICGTVLSLVG--RPMEALKLQ---
PtDXS2B (619) DHGSQTDQIEEAGLSEKHIASTAMSLVG-----
SmDXS2 (686) EHGAEQTDQIEEAGLSEKHIAGTVMSLLIG--GGKDSHLINNL
AtDXS3 (566) -----
PtDXS3 (621) EHALPFKEQLALAGLGHIAATVLRLLG--RTREALLLM---
SmDXS4 (676) EGAQFNDQLAAAGLGNHIAATALNLLG--RTRDALLLMC--
Consensus (716) DHGAP DQL EAGLTP HIAATV L L G K REAL LM

```

**Figure S3. Sequence alignment of DXS proteins from *Salvia miltiorrhiza*, *Arabidopsis thaliana* and *Populus trichocarpa*.** DXSs included are *A. thaliana* AtDXS1 (At4g15560), AtDXS2 (At3g21500), AtDXS3 (At 5G11380), *P. trichocarpa* PtDXS1(XP\_002312717), PtDXS2A (XP\_002303416), PtDXS2B (XP\_002331678), PtDXS3 (XP\_002308644), *S. miltiorrhiza* SmDXS1 (ACF21004), SmDXS2 (ACQ66107), SmDXS3 (JN831116), SmDXS4 (JN831117), SmDXS5 (JN831118). The consensus thiamine pyrophosphatase - binding motif (GDGAMTAG.....VILND) and the pyridine binding domain (DRAGLVGAD.....VMAPSD) was indicated by ‘\*\*\*’.

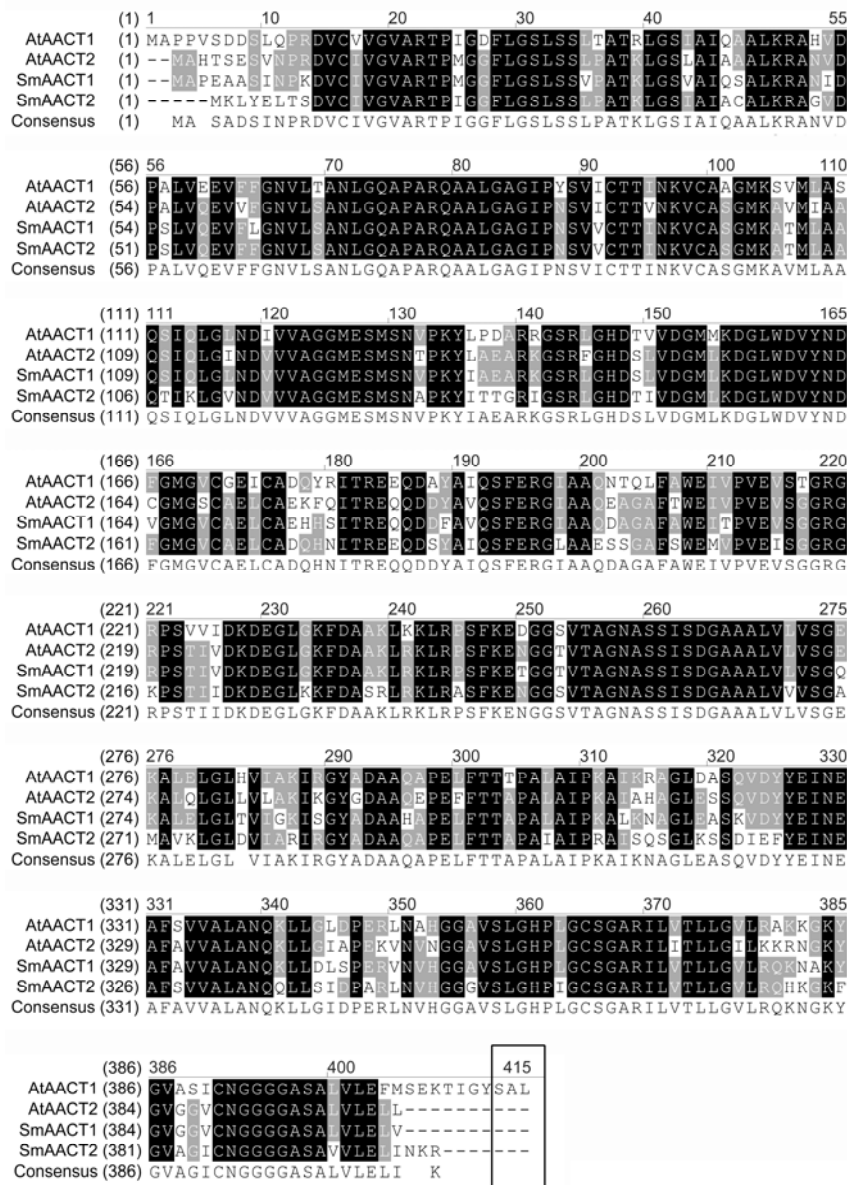

**Figure S4. Sequence alignment of AACT proteins from *S. miltiorrhiza* and *A. thaliana*.** AACTs included are *A. thaliana* AtAACT1 (At5g47720), AtAACT2 (At5g48230), *S. miltiorrhiza* SmAACT1 (ABV08820), SmAACT2 (JN831101). The peroxisomal targeting signal 1 (PTS1) related motif (SAL) presented in the carboxy terminus of AtAACT1 is boxed.



```

(1) 1 10 20 30 40 54
SmHMGR1 (1) -MDIIRRRR-ARFPPPPSASTSTSSAVD HQ-----PSSPKASDALPL
SmHMGR2 (1) -----MTT-----KMEKEAAAASDALPL
SmHMGR3 (1) -MEARRR-ENK-----LKVAVESVASDALPL
SmHMGR4 (1) -MDIIRRRR-PPKPPSPHSATSKSS-----AAPRASDALPL
CanHMGR2 (1) -MDVRRR-SEEAVYSSKVFAADEKPLKPHK-----QQQEDNTLLIDASDALPL
SIHMGR1 (1) -MDVRRR-SEKPLYTSKDASA-GEPLKQQ-----EVSSPRASDALPL
SIHMGR2 (1) -MDVRRR-SEKPVYPSKVFGADEKPLKPHN-----QQQEDNNTLLIDASDALPL
SIHMGR3 (1) -MDVRRR-SEKPLYSEHISS-GEPLKPHN-----QDSSVPRASDALPL
AihMGR1 (1) -MDLRRR-EPKPPVTNNNSNGSFRSYQPRTSDDHRRRATTIAPPPKASDALPL
AihMGR2 (1) MDLRRR-EPKTKNGEEISN-----VAVDPPLRASDALPL
Consensus (1) MDVRRR KP SA L SS KASDALPL

```

```

(55) 55 60 70 80 90 108
SmHMGR1 (40) PLYLTNGLFFTLFFSVVAYLLRWRDKIRNSTPLHVLTLSELALGLIASFIY
SmHMGR2 (20) PLYLTNGLVFFTLFFSVVYVLLLRWRDKIRNSTPLHVVTLSELISAVVVFVAFIY
SmHMGR3 (26) PLYLTNGLFFTLFFSVVYVLLLRWRDKIRNSTPLHVVTLSELISAVVVFVAFIY
SmHMGR4 (33) PLYLTNGLFFTLFFSVVAYLLRWRDKIRNSTPLHVVTLSELAAVLSLIASFIY
CanHMGR2 (48) PLYLTNGLFFTLFFSVVYVLLSRWRDKIRNSTPLHVVTLSELGAVLSLIASFIY
SIHMGR1 (40) PLYLTNGLFFTMFFSVMYVLLRWRDKIRNSTPLHVVTLSELGLAVLSLIASFIY
SIHMGR2 (49) PLYLTNGLFFTLFFSVMYVLLSRWRDKIRNSTPLHVVTLSELGAVLSLIASFIY
SIHMGR3 (41) PLYLTNGLFFTLFFSVMYVLLRWRDKIRNGTPLHVVTLSELGLAVLSLIASFIY
AihMGR1 (56) PLYLTNGLVFFTLFFSVVAYLLRWRDKIRYNTPLHVVTLSELGAVLSLIASFIY
AihMGR2 (34) PLYLTNGLFFTLFFSVVAYVLLSRWRDKIRNSTPLHVVTLSELGAVLSLIASFIY
Consensus (55) PLYLTNGLFFTLFFSVMYVLLRWRDKIRNSTPLHVVTLSELAAVLSLIASFIY

```

```

(109) 109 120 130 140 150 162
SmHMGR1 (94) LLGFFGIGDFVQSEI--KPESEDHQRFILHEARKIHCGLPPPPAP-----
SmHMGR2 (74) LLGFFGIGDFVQSLVIPRSPDEILDDEI--IDDLMLKEDSR-----
SmHMGR3 (80) LLGFFGIGDFVQSIIPRAPLEVTDEDEISDFDRMLMVKEDSP-----
SmHMGR4 (87) LLGFFGIGDFVQSEI--KSDGEID--EIRAIHCSSIPDS-----
CanHMGR2 (102) LLGFFGIGDFVQTFVA--RGNNSDWEDDEN--EQFILEEDSRGPCAAATTLG
SIHMGR1 (94) LLGFFGIGDFVQSEV--RSNSDWDIEDEN--AEQLIEEDSRGPCAAATTLG
SIHMGR2 (103) LLGFFGIGDFVQTFV--RGNNSDWEDEN--EFLFLKEDSR--CGPATTILG
SIHMGR3 (95) LLGFFGIGDFVQSEV--KGNNSDWEDES--PEQFIDRVT-----
AihMGR1 (108) LLGFFGIGDFVQSEI--RASGAWDLATIDDHRLVTCSPPTP-----
AihMGR2 (90) LLGFFGIGDFLIFRSS--DDVWVNDGMIPCNQSLDCRVLPIK-----
Consensus (109) LLGFFGIGDFVQSEV R DSWD EDEI DE LILKEDS

```

```

(163) 163 170 180 190 200 216
SmHMGR1 (137) -----VVAKAKAV-----EPODEEVVDRVVSCE
SmHMGR2 (115) -----AACSAAA-----CKMLPAEPPEDEEIVRAVVEGKI
SmHMGR3 (123) -----KICAAA-----DLKIEKIEVTDQDEEIVKSVVEGKI
SmHMGR4 (122) -----IIPKPEP-----NPEDEEIVNRVVSCE
CanHMGR2 (152) CAVPTPKAKHIAPIVPPQP--AVSIAEKPAPLVTPAAEEDDEEIKSVVQGI
SIHMGR1 (144) CVVPPVVRKIAVMPVQPAKVALSQTEKPSPIIMPALSEDEEIVQSVVQGT
SIHMGR2 (147) CAIPAPARQISVAPPQP--AMSMVEKPSPLITPASSEDEEIVNSVVOGFI
SIHMGR3 (133) -----PPVRRNI--MKS-----VPVAEKTAQIITPFSEDEEVVIVKSVVIGRI
AihMGR1 (151) -----IVSVAKL--NPE-----PIVTESEDEEIVKSVVIDEVI
AihMGR2 (131) -----INSVDP--RES-----ELDVEDEEIVKLVIDETI
Consensus (163) PP K APM II LSEEEDEEIKSVVEGKI

```

```

(217) 217 230 240 250 260 270
SmHMGR1 (164) PSYLSLESLGDKRAAARREALQRTGKSLGGLPLDGFYNSILGQCCMPV
SmHMGR2 (149) PSYLSLESLGDKRAAARREALQRTGKSLGGLPLDGFYNSILGQCCMPV
SmHMGR3 (161) PSYLSLESLGDKRAAARREALQRTGKSLGGLPLDGFYNSILGQCCMPV
SmHMGR4 (149) PSYLSLESLGDKRAAARREALQRTGKSLGGLPLDGFYNSILGQCCMPV
CanHMGR2 (203) PSYLSLESLGDKRAAARREALQRTGKSLGGLPLDGFYNSILGQCCMTIG
SIHMGR1 (198) PSYLSLESLGDKRAAARREALQRTGKSLGGLPLDGFYNSILGQCCMPV
SIHMGR2 (198) PSYLSLVQLGDKRAAARREALQRTGKSLGGLPLDGFYNSILGQCCMTIG
SIHMGR3 (176) PSYLSLESLGDKRAAARREALQRTGKSLGGLPLDGFYNSILGQCCMTIG
AihMGR1 (185) PSYLSLESLGDKRAAARREALQRTGKSLGGLPLDGFYNSILGQCCMPV
AihMGR2 (160) PSYLSLVQLGDKRAAARREALQRTGKSLGGLPLDGFYNSILGQCCMPV
Consensus (217) PSYLSLESLGDKRAAARREALQRTGKSLGGLPLEGDFYNSILGQCCMPV
*****

```

```

(271) 271 280 290 300 310 324
SmHMGR1 (218) YVQIPVGIAGPLLLNGREYSVPMATTEGCLVASTNRRGCKAIYASGGATSVLRLD
SmHMGR2 (203) YVQIPVGIAGPLLLNGREYSVPMATTEGCLVASTNRRGCKAIYASGGATSAVHLD
SmHMGR3 (215) YVQIPVGIAGPLLLNGREYSVPMATTEGCLVASTNRRGCKAIYASGGATSSYLD
SmHMGR4 (203) YVQIPVGIAGPLLLNGREYSVPMATTEGCLVASTNRRGCKAIYASGGATVCLLD
CanHMGR2 (257) YVQIPVGIAGPLLLNGREYSVPMATTEGCLVASTNRRGCKAIYASGGATSVLRLD
SIHMGR1 (252) YVQIPVGIAGPLLLNGREYSVPMATTEGCLVASTNRRGCKAIYASGGATSVLRLD
SIHMGR2 (252) YVQIPVGIAGPLLLNGREYSVPMATTEGCLVASTNRRGCKAIYASGGATSVLRLD
SIHMGR3 (230) YVQIPVGIAGPLLLNGREYSVPMATTEGCLVASTNRRGCKAIYASGGATSVLRLD
AihMGR1 (239) YVQIPVGIAGPLLLNGREYSVPMATTEGCLVASTNRRGCKAIYASGGATSVLRLD
AihMGR2 (214) YVQIPVGIAGPLLLNGREYSVPMATTEGCLVASTNRRGCKAIYASGGATSVLRLD
Consensus (271) YVQIPVGIAGPLLLNGREYSVPMATTEGCLVASTNRRGCKAIYASGGATSVLRLD
*****

```

```

(325) 325 330 340 350 360 378
SmHMGR1 (272) MTRAPVRFSA RAVELKFFLEPNFDL VFNSSRFRLQNVCC IAG
SmHMGR2 (257) MTRAPVRFSA RAVELKFFLEPNFDL VFNSSRFRLQNVCC IAG
SmHMGR3 (269) MTRAPVRFSA RAVELKFFLEPNFDL VFNSSRFRLQNVCC IAG
SmHMGR4 (257) MTRAPVRFSA RAVELKFFLEPNFDL VFNSSRFRLQNVCC IAG
CanHMGR2 (311) MTRAPVRFSGTARA RAVELKFFLEPNFDL VFNSSRFRLQNVCC IAG
SIHMGR1 (306) MTRAPVRFSGTARA RAVELKFFLEPNFDL VFNSSRFRLQNVCC IAG
SIHMGR2 (306) MTRAPVRFSGTARA RAVELKFFLEPNFDL VFNSSRFRLQNVCC IAG
SIHMGR3 (284) MTRAPVRFSA RAVELKFFLEPNFDL VFNSSRFRLQNVCC IAG
AihMGR1 (293) MTRAPVRFSA RAVELKFFLEPNFDL VFNSSRFRLQNVCC IAG
AihMGR2 (268) MTRAPVRFSA RAVELKFFLEPNFDL VFNSSRFRLQNVCC IAG
Consensus (325) GMTRAPVRFSGAKRAAELKFFLEPNFDL VFNSSRFRLQNVCC IAGCAIAG
***

```

```

(379) 379 390 400 410 420 432
SmHMGR1 (326) NLYIRFSCSTGDAMGMNMVSKGVNLDYLNQEFDMVIGISNFCSDKKPA
SmHMGR2 (311) NLYIRFSCSTGDAMGMNMVSKGVNLDYLNQEFDMVIGISNFCSDKKPA
SmHMGR3 (323) NLYIRFSCSTGDAMGMNMVSKGVNLDYLNQEFDMVIGISNFCSDKKPA
SmHMGR4 (311) NLYIRFSCSTGDAMGMNMVSKGVNLDYLNQEFDMVIGISNFCSDKKPA
CanHMGR2 (365) NLYIRFSCSTGDAMGMNMVSKGVNLDYLNQEFDMVIGISNFCSDKKPA
SIHMGR1 (360) NLYIRFSCSTGDAMGMNMVSKGVNLDYLNQEFDMVIGISNFCSDKKPA
SIHMGR2 (360) NLYIRFSCSTGDAMGMNMVSKGVNLDYLNQEFDMVIGISNFCSDKKPA
SIHMGR3 (338) NLYIRFSCSTGDAMGMNMVSKGVNLDYLNQEFDMVIGISNFCSDKKPA
AihMGR1 (347) NLYIRFSCSTGDAMGMNMVSKGVNLDYLNQEFDMVIGISNFCSDKKPA
AihMGR2 (322) NLYIRFSCSTGDAMGMNMVSKGVNLDYLNQEFDMVIGISNFCSDKKPA
Consensus (379) NLYIRFSCSTGDAMGMNMVSKGVNLDYLNQEFDMVIGISNFCSDKKPA
*****

```

```

(433) 433      440      450      460      470      486
SmHMGR1 (380) AVNWIEGRGKSVVCEAVITADVSKV LKLTVP S LVELN LKKNL GSAIAG LGG
SmHMGR2 (365) AVNWIEGRGKSVVCEAVIKEEVVKV LKTNVAALVELN LKKNL GSAIAG LGG
SmHMGR3 (377) AVNWIEGRGKSVVCEAVITGDVVKV LKLTDV S LVELN LKKNL GSAIAG LGG
SmHMGR4 (365) AVNWIEGRGKSVVCEAVLRGDVVAK LKLTVP S LVELN LKKNL GSAIAG LGG
CanHMGR2 (419) AVNWIEGRGKSVVCEAVITTEE VVKV LKTEVAALVELN LKKNL GSAIAG LGG
StHMGR1 (414) AVNWIEGRGKSVVCEAVIKEEVVKV LKTEVAALVELN LKKNL GSAIAG LGG
StHMGR2 (414) AVNWIEGRGKSVVCEAVITTEE VVKV LKTEVAALVELN LKKNL GSAIAG LGG
StHMGR3 (392) AVNWIEGRGKSVVCEAVIKEDVVKV LKTEVA T LVELN LKKNL GSAIAG LGG
AtHMGR1 (401) AVNWIEGRGKSVVCEAVIRGIVNKKV LKTSVA LVELN LKKNL GSAIAG LGG
AtHMGR2 (376) AVNWIEGRGKSVVCEAVFKAEIVK LKTSVE LVELN LKKNL GSAIAG LGG
Consensus (433) AVNWIEGRGKSVVCEAVIKEEVVKV LKTEVAALVELN LKKNL GSAIAG LGG

(487) 487      500      510      520      530      540
SmHMGR1 (434) FNAHASNIVSAVFIATGQDPAQNI ESSHCITMMEAINDGKDLH SVT M P S IEVG
SmHMGR2 (419) FNAHASNIVSAVFIATGQDPAQNV ESSHCITMMEAVNGGKDLH SVT M P S IEVG
SmHMGR3 (431) FNAHASNIVSAIYFIATGQDPAQNI ESSHCITMMEAVNDGKDLH SVT M P C IEVG
SmHMGR4 (419) FNAHASNIVSAVFIATGQDPAQNV ESSHCITMMEAVNDGKDLH SVT M P S IEVG
CanHMGR2 (473) FNAHASNIVSAVFIATGQDPAQNI ESSHCITMMEAVNDGKDLH SVT M P S IEVG
StHMGR1 (468) FNAHASNIVSAVFIATGQDPAQNV ESSHCITMMEAVNDGKDLH SVT M P S IEVG
StHMGR2 (468) FNAHASNIVSAVFIATGQDPAQNI ESSHCITMMEAVNDGKDLH SVT M P S IEVG
StHMGR3 (446) FNAHASNIVSAVFIATGQDPAQNI ESSHCITMMEAVNDGKDLH SVT M P S IEVG
AtHMGR1 (455) FNAHASNIVSAVFIATGQDPAQNV ESSHCITMMEAINDGKDLH SVT M P S IEVG
AtHMGR2 (430) FNAHASNIVSAVFIATGQDPAQNV ESSHCITMMLPDGDLH SVT M P C IEVG
Consensus (487) FNAHASNIVSAVFIATGQDPAQNI ESSHCITMMEAVNDGKDLH SVT M P S IEVG
*

(541) 541      550      560      570      580      594
SmHMGR1 (488) TVGGGTQLASQSACLNLLGVKGANKE SPGSNARLLATIVAGSVL A G E L S L M S A I
SmHMGR2 (473) TVGGGTQLASQSACLNLLGVKGANKE VPGANSRLLATIVAGSVL A G E L S L M S A I
SmHMGR3 (485) TVGGGTQLASQSACLNLLGVKGANKEAPG SNARLLATIVAGSVL A G E L S L M S A I
SmHMGR4 (473) TVGGGTQLASQSACLNLLGVKGANKE SPGSNQQLAAVVA S V L A G E L S L M S A I
CanHMGR2 (527) TVGGGTQLASQSACLNLLGVKGANREAPG SNARLLATIVAGSVL A G E L S L M S A I
StHMGR1 (522) TVGGGTQLASQSACLNLLGVKGANREDPG SNARLLATIVAGSVL A G E L S L M S A I
StHMGR2 (522) TVGGGTQLASQSACLNLLGVKGANREAPG SNARLLATIVAGSVL A G E L S L M S A I
StHMGR3 (500) TVGGGTQLASQSACLNLLGVKGANREAPG SNARLLATIVAGSVL A G E L S L M S A I
AtHMGR1 (509) TVGGGTQLASQSACLNLLGVKGANREAPG SNARLLATIVAGSVL A G E L S L M S A I
AtHMGR2 (482) TVGGGTQLASQSACLNLLGVKGANREAPG SNARLLATIVAGSVL A G E L S L M S A I
Consensus (541) TVGGGTQLASQSACLNLLGVKGANKEAPG SNARLLATIVAGSVL A G E L S L M S A I
*****

(595) 595      600      610      624
SmHMGR1 (542) SAGQLVNSHMKYNRSSRDITK IGS-----
SmHMGR2 (527) AAGQLVNSHMKYNRSSKDVTKLST-----
SmHMGR3 (539) AAGQLVNSHMKYNRSSKDVASMK S-----
SmHMGR4 (527) AAGQLVNSHMKYNRSSRDITRLGS-----
CanHMGR2 (581) SAGQLVNSHMKYNRSSKDVTKASS-----
StHMGR1 (576) SAGQLVNSHMKYNRSSKDVTKS-----
StHMGR2 (576) SAGQLVNSHMKYNRSSKASS-----
StHMGR3 (554) SAGQLVNSHMKYNRSSKDVTK-----
AtHMGR1 (563) AAGQLVNSHMKYNRSSRDISGATTTTTTTT
AtHMGR2 (536) AAGQLVNSHMKYNRSSRDIGPSSQVNR---
Consensus (595) AAGQLVNSHMKYNRSSKDVTK S
***

```

**Figure S5. Sequence alignment of HMGR proteins from *S. miltiorrhiza* and various other plants.** Proteins included are *Arabidopsis thaliana* AtHMGR1 (CAA33139), AtHMGR2 (AAA67317), *Solanum tuberosum* StHMGR1 (AAA93498), StHMGR2 (AAB52551), StHMGR3 (AAB52552), *Capsicum annum* CanHMGR2 (AAD28179), and four *S. miltiorrhiza* SmHMGRs. The putative HMG-CoA-binding sites (EMPIGYVQIP and TTEGCLVA), NADP(H)-binding sites (DAMGMNM and GTVGGGT) and N-linked glycosylation sites (N-X-S/T) are indicated by “\*\*\*”. The N-glycosylation site (NST) is boxed.

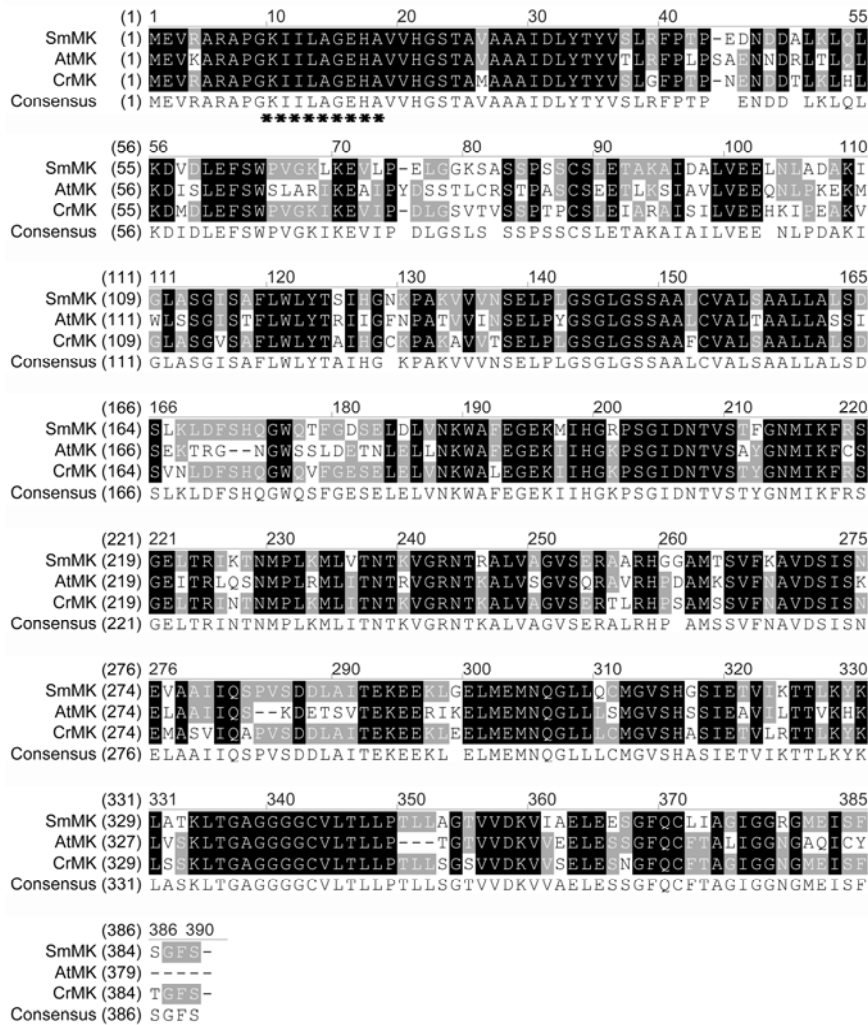

**Figure S6. Sequence alignment of MK proteins from *S. miltiorrhiza*, *Arabidopsis thaliana* and *Catharanthus roseus*.** Proteins included are *A. thaliana* AtMK (NP\_198097), *C. roseus* CrMK (ADR65111), and *S. miltiorrhiza* SmMK (JN831104). The peroxisomal targeting signal 2 (PTS2) related nonapeptide (KIILAGEHA) is indicated by ‘\*\*\*’.

```

(1) 1 10 20 30 40 55
SmPMK (1) MAVVASAPGKVLMTGGYL LERPNAGI VLSTNARFYAIVKPLINEEAKPDSWAWSW
AtPMK (1) MAVVASAPGKVLMTGGYL LERPNAGI VLSTNARFYAIVKPLINEEAKPDSWAWSW
CrPMK (1) MAVVASAPGKVLMTGGYL LERPNAGI VLSTNARFYAIVKPLINEEAKPDSWAWSW
Consensus (1) MAVVASAPGKVLMTGGYLVLERPNAGI VLSTNARFYAIVKPLINEELKPEWSAWAW

(56) 56 70 80 90 100 110
SmPMK (56) TDVKLTSPQMGREIMYKSLKTLQLQSVSSDTRNPFVEYALYVYAAACATFDQ
AtPMK (56) TDVKLTSPQLSRRESMYKSLNHLQLQSVASDSRNPFVEHAIQYAIAAAHLATEK
CrPMK (56) TDVKLTSPQMSREIMYKSLKYLQLQCVSSDSRNPFVEHAIQYVVAAYAKFDN
Consensus (56) TDVKLTSPQMSRESMYKSLKHLTLQSVSSDSRNPFVEHAIQYVVAAAHA FDN
***

(111) 111 120 130 140 150 165
SmPMK (111) PKKDELOKLLLLGLDITILGDNFYSYRNQIEARGLPLTSESLASLPEFTSIAFN
AtPMK (111) PKKESLHKLLLLGLDITILGSDNFYSYRNQIEASAGLPLTPESLGTLPFASITFN
CrPMK (111) PKKDSLRLKLLLLGLDITILGDNFYSYRNQIEAQRPLTPESLALLPEFSITFN
Consensus (111) DKKDSL KLLLQGLDITILGCNEFYSYRNQIEA GLPLTPESLASLPPFSITFN

(166) 166 180 190 200 210 220
SmPMK (166) AEESGQKSKPEVAKTGLGSSAAMTTAVVAALLHYLGVVSLPEFSGPLEGDKVS
AtPMK (166) AESNGANSKPEVAKTGLGSSAAMTTAVVAALLHYLGVVSLDPCKEGKF---GC
CrPMK (166) AEESGQ--KPEVAKTGLGSSAAMTTAVVAALLHYLGVVSLSS--NKE-----A
Consensus (166) AEESGQ SKPEVAKTGLGSSAAMTTAVVAALLHYLGVVDSLSS KE A

(221) 221 230 240 250 260 275
SmPMK (221) AALDVHVMIAQTAHCAIQGKVGSGFDVSSAVYGSQRYVRFSPPEVLSAQDAGRGI
AtPMK (217) SALDVHVMIAQTAHCAIQGKVGSGFDVSSAVYGSQRYVRFSPPEVLSFAQVAVTGL
CrPMK (211) VNLDVHVMIAQTAHCAIQGKVGSGFDVSSAVYGSQRYVRFSPPEVLSAQSAVNGL
Consensus (221) ADLDVHVMIAQTAHCAIQGKVGSGFDVSSAVYGSQRYVRFSPPEVLSAQ AV GL

(276) 276 290 300 310 320 330
SmPMK (276) PLEEFATINYLKLNWDHERTFSLPPMNTLLGEPGGGSSTPSMVGAVKKWQKSD
AtPMK (272) PLENEFATITLKGKWDNKRTEFSLPPMNTLLGEPGGGSSTPSMVGAVKKWQMSD
CrPMK (266) PLEEDVATDVLKAKWDHERTFSLPPMNTLLGEPGGGSSTPSMVGAVKKWQKSD
Consensus (276) PLEEVIG VLKAKWDHERTKFSLPPLMNTLLGEPGPTGGSSTPSMVGAVKKWQKSD

(331) 331 340 350 360 370 385
SmPMK (331) PQNSLEWKKLSANSTLEMLKLSRLAEINFDYKSTTIKCSLTSEKWRDEA
AtPMK (327) PEKARENWQNLSANLELETKLNDSLAKDHWVYLRVIRKSCSVLTSEKRWLHA
CrPMK (321) PQNSLEWRKLSANSALELHFNLSRLAEDSDGVYGTVINNCSMLTYDKWVGGE
Consensus (331) PQNSLETWKKLSDANS LELHLNLTSLKLADD FDVY SVI CSMLTSEKRWV A

(386) 386 400 410 420 430 440
SmPMK (386) LPEFNKIEVFKLLARAAALGIRCNMRKMGEAAGPIEPESQTQLLDTMNMMEGV
AtPMK (382) TEPINEATIKELLEAREAVLRIRILMRQMGEAASVPIEPESQTQLLDTMSAEGV
CrPMK (376) NE-MSQATLKLARAAALGIRYHMRKMGEAAGPIEPESQTQLLDTMNMMEGV
Consensus (386) EPI AIIKALLGARDAML IR MRKMGEAAGPIEPESQTQLLDTMNMMEGV

(441) 441 450 460 470 480 495
SmPMK (441) LLAGVPGAGGFDAIFAVTLGESSNVVKVWSSNLNVLALLVREDPRGVFLESNDPR
AtPMK (437) LLAGVPGAGGFDAIFAVTLGDSGTKLTQAWSSHNVLALLVREDPHGVCFLESNDPR
CrPMK (430) LLAGVPGAGGFDAIFAVTLGSSENVIKAWTSSNLNVLALLVREDPNGVSIQNDPQ
Consensus (441) LLAGVPGAGGFDAVFAITLGDSSNVIKAWSS NVLALLVREDP GV LESNDPR

(496) 496 509
SmPMK (496) TTEITGAVSSIRTE
AtPMK (492) TTCITSGVSSIHLE
CrPMK (485) ATGITSGVSSIRTE
Consensus (496) TT ITSGVSSIKIE

```

**Figure S7. Sequence alignment of PMK proteins from *S. miltiorrhiza*, *Arabidopsis thaliana* and *Catharanthus roseus*.** Proteins included are *A. thaliana* AtPMK (NP\_174473), *C. roseus* CrPMK (ADR65112), and *S. miltiorrhiza* SmPMK (JN831095). The PTS2 related nonapeptide (DVKLTSPQL/M) is indicated by ‘\*\*\*’.

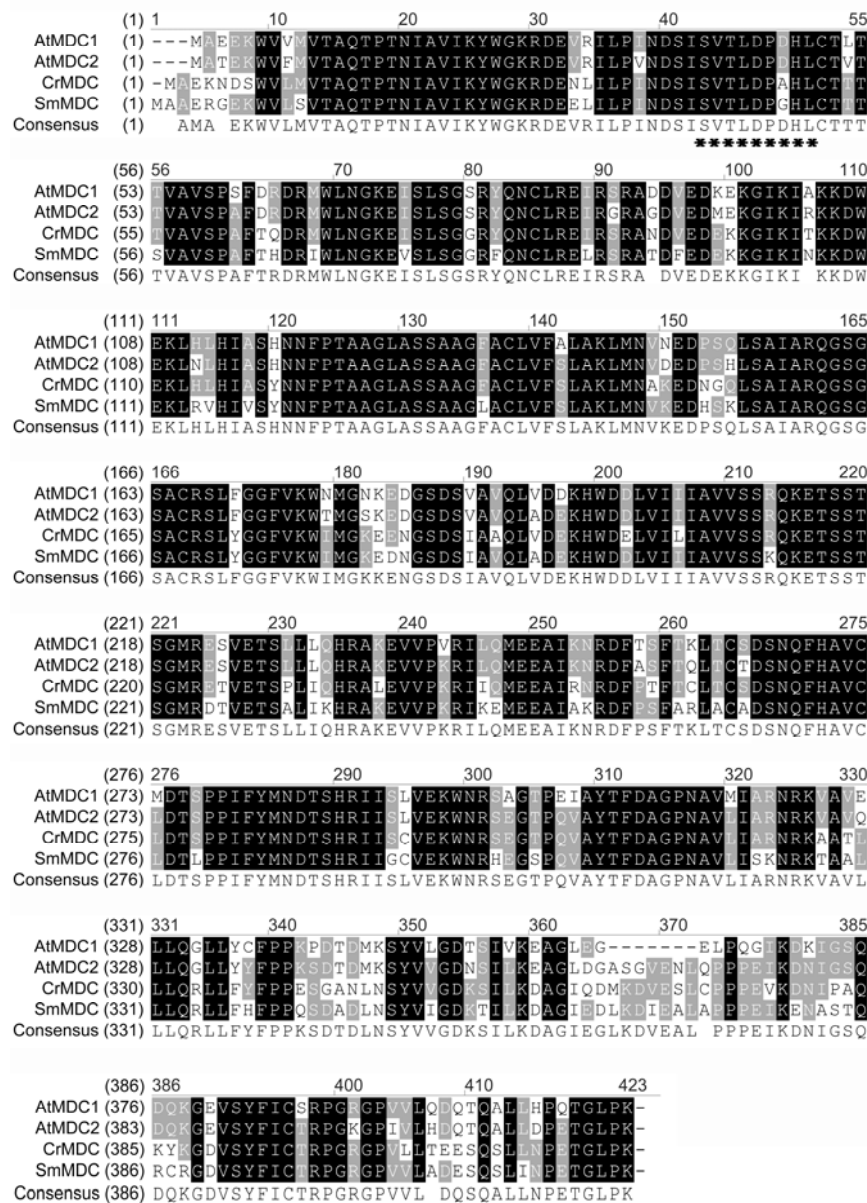

**Figure S8. Sequence alignment of MDC proteins from *S. miltiorrhiza*, *Arabidopsis thaliana* and *Catharanthus roseus*.** Proteins included are *A. thaliana* AtMDC (NP\_174473), *C. roseus* CrMDC (ADR65113), and *S. miltiorrhiza* SmMDC (JN831105). The PTS2 related nonapeptide (SVTLDPXHL) is indicated by ‘\*\*\*\*’.

```

(1) 1          10          20          30          40          55
AtID1 (1) --MSTASLFSFSFSFHLRSLLPSLSSSSSSSSSSRFAPPRLSPIRSPAPRTQLSVRA
AtID2 (1) --MSASSLFNLELLIRLR-----SLALSSSFSSFRFAHRPLSSIS---PRKLPNFRA
SmlD11 (1) -----
SmlD12 (1) MSFSSSTLITTNAIRLR-----NSSPSS--SRSRLPIKSLPLRR-----
Consensus (1) MSSSSLFS PAIRLR      SLS SSS SSSRFA K LS IR      PR      RA

(56) 56          70          80          90          100         110
AtID1 (54) FSAVTMTDSNDAGMDAVQRRLMFEDECILVDENDRVVGHDTKYNCHLMEKIEAEN
AtID2 (47) FSGTAMTDTKDAGMDAVQRRLMFEDECILVDENDRVVGHDSKYNCHLMENIEAKN
SmlD11 (1) ---MGDVAAAADSAMDAVQRRLMFEDECILVDENDHVVGHESKYNCHLMEKIEALN
SmlD12 (38) -----QVCSSAMDAVQRRLMFEDECILVDENDAVVGHDTKYNCHLMEKIDSEN
Consensus (56) FSAMAMTDS DAAMDAVQRRLMFEDECILVDENDRVVGHDSKYNCHLMEKIEAEN

(111) 111         120         130         140         150         165
AtID1 (109) LLHRAFSVFLFNSKYELLLQQRSKTKVTFPLVWTNTCCSHPLYRESELEENVLG
AtID2 (102) LLHRAFSVFLFNSKYELLLQQRSNTKVTFPLVWTNTCCSHPLYRESELEQDNALG
SmlD11 (53) LLHRAFSVFLFNSKYELLLQQRSTTKVTFPLVWTNTCCSHPLYRDSELEENALG
SmlD12 (86) LLHRAFSVFLFNSKNELLLQQRSASKVTFPLVWTNTCCSHPLHTESELVEDDALG
Consensus (111) LLHRAFSVFLFNSKYELLLQQRS TKVTFPLVWTNTCCSHPLYRESELEIDNALG

(166) 166         180         190         200         210         220
AtID1 (164) VRNAAQRKLLDELGIVAEDVPVDEFTPLGRMLYKAPSDGKWGEHELDYLLFIVRD
AtID2 (157) VRNAAQRKLLDELGIVAEDVPVDEFTPLGRMLYKAPSDGKWGEHELDYLLFIVRD
SmlD11 (108) VRNAAQRKLLDELGIVAEDVPVDCFVPLGRMLYKAPSDGKWGEHELDYLLFIVRD
SmlD12 (141) VRNAAQRKLLDELGIVAEDVPVDEFLPLGRMLYKAPSDGKWGEHELDYLLFIVRD
Consensus (166) VRNAAQRKLLDELGIVAEDVPVDEFTPLGRMLYKAPSDGKWGEHELDYLLFIVRD

(221) 221         230         240         250         260         275
AtID1 (219) VKLQPNPDEVAEIKYVSREELKELVKKADAGEEAVKLSPWFRLVVDNFLMKWWDH
AtID2 (212) VKVQPNPDEVAEIKYVSREELKELVKKADAGEEGLKSPWFRLVVDNFLMKWWDH
SmlD11 (163) VSVHPNPDEVHDKYVNREELKELLRKADAGEEGLKSPWFRLVVDNFLMKWWDH
SmlD12 (196) VRLEPNPDEVADVKYVSREQLELLRKKADAGEDGLKSPWFRLVVDNFLMKWWDH
Consensus (221) VKLQPNPDEVADIKYVSREELKELLKKADAGEEGLKSPWFRLVVDNFLMKWWDH

(276) 276         294
AtID1 (274) VEKGTITEAADMKTIHKL-
AtID2 (267) VEKGTLVEAIDMKTIHKL-
SmlD11 (218) VEKGTIKEAVMKTIHKL-
SmlD12 (251) VDAGTLAQAADMKTIHKL-
Consensus (276) VEKGTI EAADMKTIHKL-
***

```

**Figure S9.** Sequence alignment of IDI proteins from *S. miltiorrhiza* and *Arabidopsis thaliana*. Proteins included are *A. thaliana* AtIDI1 (NP\_197148), AtIDI2 (NP\_186927), and two *S. miltiorrhiza* SmlIDIs. The PTS1 related motif (HKL) is indicated by ‘\*\*\*’.

|                |     |              |               |              |             |            |    |
|----------------|-----|--------------|---------------|--------------|-------------|------------|----|
|                | (1) | 1            | 10            | 20           | 30          | 40         | 51 |
| SmGPPS         | (1) | -----        | MISVRGLARLAR  | SGYARRRWVYSS | LGCSGSAPLQ  | LEHS       |    |
| SIGPPS         | (1) | -----        | MIFSKGLAQISR  | NRFRCRWLFS   | LR-----     | PIPQLHQS   |    |
| CrGPPS         | (1) | -----        | MLFSRGLYRIART | SLNRSRLLYPL  | QSQ-----    | QSPELLQS   |    |
| SmGPPS.LSU     | (1) | MSLLVNPLA--- | TTC---        | VKDVGGRRSRS  | -----       |            |    |
| MpGPPS.LSU     | (1) | MSALVNPVAKWP | QTIG---       | VKDVGGRRRRS  | RSTLFAQSHPL | -RTEMPFSLY |    |
| AmGPPS.LSU     | (1) | -MSLVNPITWST | TTTTSKSPKNV   | QTTTRSRS---  | IILPHK-     | ISLFPSPNP- |    |
| SmGPPS.SSUI    | (1) | -----        | MANYHSIYLHNT  | I-----       |             |            |    |
| MpGPPS.SSUI    | (1) | -----        | MA-----       |              |             |            |    |
| AmGPPS.SSUI    | (1) | -----        | MA-----       |              |             |            |    |
| SmGPPS.SSUII.1 | (1) | -----        | MALSIAVTP     | -----        |             |            |    |
| OsGPPS.SSUII   | (1) | -----        | MALSSFSMS     | -----        |             |            |    |
| SmGPPS.SSUII.2 | (1) | -----        | MLFS-----     |              |             |            |    |
| AtGPPS.SSUII   | (1) | -----        | MLFSGSAIPL    | -----        |             |            |    |
| Consensus      | (1) |              | M S           |              |             |            |    |

|                |      |              |             |            |            |           |                |
|----------------|------|--------------|-------------|------------|------------|-----------|----------------|
|                | (52) | 52           | 60          | 70         | 80         | 90        | 102            |
| SmGPPS         | (39) | SHERNPIQSSRE | VLGCRVIYSWV | SNAISTVGQV | HLQSSSAVEE | QLD       | PFSL           |
| SIGPPS         | (34) | NHHDDP----   | KVLGCRVIHSW | VSNALSGIGQ | QIHQQSTAVA | EEQV      | DPFSL          |
| CrGPPS         | (35) | FQFRSPIGSSQ  | KVSGFRVIYS  | WVSSALANVG | QVQRQNSVAE | EPLD      | PFSL           |
| SmGPPS.LSU     | (25) | -G-LLSTSVKTR | ISAVY       | KED-K-N-   | -----      | PTWAAF    | DFKRY          |
| MpGPPS.LSU     | (48) | FSSPLKAPATF  | SVAVY       | KEGSEIRD   | KD-----    | PAPSTSPAF | DFDGY          |
| AmGPPS.LSU     | (45) | -KSKSKTHLR   | FSSIL       | KNPQESSQ   | K-----     | TSKDPTFTL | DFPKTY         |
| SmGPPS.SSUI    | (14) | -KMSIYVNTKS  | -SFPFK      | RSNLS      | SS-----    | RACTAVVAQ | NHSY           |
| MpGPPS.SSUI    | (3)  | -INLSHINSKT  | -CFPLK      | RSDL       | SSSARCMP   | TAAAAA    | FPPIATAAQSQPY  |
| AmGPPS.SSUI    | (3)  | -HGLTHFNTK   | SGLFPSI     | KSKTT      | PS-----    | TRPVILAM  | TRTQTY         |
| SmGPPS.SSUII.1 | (10) | -----        | SSNSRMPRTA  | VLRRAV     | RCSS-----  | AASVPTQP  | DLRNY          |
| OsGPPS.SSUII   | (10) | -----        | LPFAKLPST   | SKSR       | FLPI       | ASSA----- | AAAAAASPFDLRLY |
| SmGPPS.SSUII.2 | (5)  | -----        | SVITSTPHV   | CLPKVTRPAL | RTIR-----  | CSAASVSP  | PGFDLKTY       |
| AtGPPS.SSUII   | (11) | -SSFCSLPEK   | PHTLPMKLS   | PAAT       | SSS-----   | SSAPGSLNF | DLRTY          |
| Consensus      | (52) |              | SK V KTK    | VR S       |            | SAA       | D SY           |

|                 |       |             |            |              |            |           |            |           |
|-----------------|-------|-------------|------------|--------------|------------|-----------|------------|-----------|
|                 | (103) | 103         | 110        | 120          | 130        | 140       | 153        |           |
| SmGPPS          | (90)  | VADELSILADR | LRSMVVAEV  | PKLASAAEY    | FFKFGVE--- | GKFRF     | PTVLL      |           |
| SIGPPS          | (81)  | VADELSLLTNR | LRSMVVAEV  | PKLASAAEY    | FFKFGVE--- | GKFRF     | PTVLL      |           |
| CrGPPS          | (86)  | VADELSILANR | LRSMVVAEV  | PKLASAAEY    | FFKFGVE--- | GKFRF     | PTVLL      |           |
| SmGPPS.LSU      | (57)  | MVEKADSVNKA | LEAVVQMK   | PLKTHES      | MRYSLLAGG  | -----     | KRVRPMLCI  |           |
| MpGPPS.LSU      | (90)  | MLRKAKSVNKA | LEAVVQMK   | PLKTHES      | MRYSLLAGG  | -----     | KRVRPMLCI  |           |
| AmGPPS.LSU      | (85)  | MLEKASSVNKA | LEAVVQMK   | PLKTHES      | MRYSLLAGG  | -----     | KRVRPMLCI  |           |
| SmGPPS.SSUI     | (51)  | WAAIEADIDTY | LKKSIAIR   | SPETVFEP     | HHLTF      | PAPE----- | RTAASAICV  |           |
| MpGPPS.SSUI     | (52)  | WAAIEADIERY | LKKSITIR   | PPETVFGP     | HHLTF      | PAPE----- | ATAASTLCL  |           |
| AmGPPS.SSUI     | (42)  | RATIESDIESY | LKKIPIR    | APESVFE      | P          | HHLTF     | PAPE-----  | RTSASALCV |
| SmGPPS.SSUII.1  | (44)  | WTSLISDVDRK | LNDVPLKY   | PELTHES      | MRYSLLAGT  | -----     | AKRAPPVLCV |           |
| OsGPPS.SSUII    | (48)  | WTSLIADVEAE | LDAAMP     | IRTPER       | THSAMRYAV  | PGAGNEGTA | KRAPPVLCV  |           |
| SmGPPS.SSUII.2  | (44)  | WTSLIKEIDQK | LDEAIPVKY  | PQQHYE       | AMRYSVLAGG | -----     | AKRAPPVLCV |           |
| AtGPPS.SSUII    | (51)  | WTTLLITEINQ | KLDEAIPVKH | PAGHYE       | AMRYSVLAGG | -----     | AKRAPPVLCV |           |
| Consensus (103) |       | LISDI       | L AV IK P  | IHEAMRYSLLAG |            | AKRA      | PVLCV      |           |

|                 |       |           |          |            |          |             |            |
|-----------------|-------|-----------|----------|------------|----------|-------------|------------|
|                 | (154) | 154       | 160      | 170        | 180      | 190         | 204        |
| SmGPPS          | (136) | LMATALDLP | PIARQTSE | VAVNTLSTEL | TRQCCV   | AEITEMI     | HVASLHDDVL |
| SIGPPS          | (127) | LMATALNVQ | IPRSAPQ  | VDVDSFSGDL | TRQCCIAE | ITEMI       | HVASLHDDVL |
| CrGPPS          | (132) | LMATAIDAP | ISRTPPD  | SLDTLSTEL  | LRQQTAE  | ITKMI       | HVASLHDDVL |
| SmGPPS.LSU      | (102) | AACELVGG  | -----    | EESTAMP    | AACAVEM  | IHTMSLM     | HDDLP      |
| MpGPPS.LSU      | (135) | AACELVGG  | -----    | DESTAMP    | AACAVEM  | IHTMSLM     | HDDLP      |
| AmGPPS.LSU      | (130) | AACELVGG  | -----    | LESTAMP    | SACAVEM  | IHTMSLI     | HDDLP      |
| SmGPPS.SSUI     | (96)  | AACELVGG  | -----    | ERSQAIAT   | ASAIHIM  | HAAYAEH     | HLPL       |
| MpGPPS.SSUI     | (97)  | AACELVGG  | -----    | DRSQAMAAA  | AAIHLV   | HAAYAEH     | HLPL       |
| AmGPPS.SSUI     | (87)  | AACELVGG  | -----    | DRSDAMAAA  | AAVHLM   | HVAAYTHE    | NLPL       |
| SmGPPS.SSUII.1  | (90)  | AACELVGG  | -----    | DRAAAI     | TVCALE   | EMVHAAS     | FVHDDLP    |
| OsGPPS.SSUII    | (99)  | AACELVGA  | -----    | PREAAL     | AAVALE   | MLHAAS      | LVHDDLP    |
| SmGPPS.SSUII.2  | (90)  | AACEIFGG  | -----    | NRLAAF     | TACALE   | EMVHAS      | LIHDDLP    |
| AtGPPS.SSUII    | (97)  | AACEIFGG  | -----    | DRLAAF     | TACALE   | EMVHAS      | LIHDDLP    |
| Consensus (154) |       | AACELVGG  |          | DRS AMP A  | ALEM     | IAASLIHDDLP |            |

```

(205) 205      210      220      230      240      255
SmGPPS (187) DDADT--RRGIGSLNYVMNKLAVLNGDFLLSRQCVALSLKN---TE---
SIGPPS (178) DDADT--RRGIGSLNFVMNKLAVLNGDFLLSRQCVALSLKN---TE---
CrGPPS (183) DDAET--RRGIGSLNFVMNKLAVLNGDFLLSRQCVALSLKN---TE---
SmGPPS.LSU (136) CMDNDLLRRGKPTNPKVFEDEVAVLAGDALLSLAFEHVAATRGSAPE---
MpGPPS.LSU (169) CMDNDLLRRGKPTNMAFESVAVLAGDALLSFAFEHVAATKGAPE---
AmGPPS.LSU (164) CMDNDLLRRGKPTNPKIYEDVAVLAGDALLAFSEHVAKSTKGVSSD---
SmGPPS.SSUI (130) LTRDP-RPNSKPAIQHKYFNIEELTGGDMASFGHELLAGSIRSDHPN-PE
MpGPPS.SSUI (131) LTRDGS-RPVSKPAIQHKYFNVEELTGGDGIVPFGHELLAGSVDPARTDDPD
AmGPPS.SSUI (121) LTRDG---PMSKSEIQHKFDPNIEELTGGDGIIPFGLELMA RSMDPTRNN-PD
SmGPPS.SSUII.1 (124) YIDDALSRGQLPNTLYPDMAELAGDALLPLAQYIVLHTP-TQLVSQL
OsGPPS.SSUII (133) CFDAAPTRRGRPSTAAAYTDMAVLAGDALLFPLAYTHVIAHTPSPDPVPHA
SmGPPS.SSUII.2 (124) CMDDDPSRRGQPSNITVFDMAELAGDALLFPLAQYHIVSHTP-TDLVPHT
AtGPPS.SSUII (131) CMDDDPVRRGKPSNITVYSGMAELAGDALLFPLAQYHIVSHTP-PDLVPHA
Consensus (205) D RRGKPS H VYG MAVLAGDALLS AF HLAS T E
***

```

```

(256) 256      270      280      290      306
SmGPPS (230) ----VVTLLIQV--EHLTGETMQMTTSEQRCSMEYYMEKTYKTASII
SIGPPS (221) ----VVCLLATV--EHLTGETMQMTTSSDERCSMEYYMQTKTYKTASII
CrGPPS (226) ----VVSLLATV--EHLTGETMQMTTSDQRCSMEYYMQTKTYMYTASII
SmGPPS.LSU (184) RILRALGQLAKSIAEGLVAGQVVDICSEGMAEVGLDHLFEFIHLHTAAAL
MpGPPS.LSU (217) RIVRVLGLAVSICSEGLVAGQVVDICSEGMAEVGLDHLFEFIHLHTAAAL
AmGPPS.LSU (212) RIVRVIGELAKKICSEGLVAGQVVDISSEGMTEVGLHEHLEFIHVKHTAAAL
SmGPPS.SSUI (179) RILRVIIETSRASSEGIIDGFYREKEI-VDQHSRFDFFEYLCKKYGEMH
MpGPPS.SSUI (181) RILRVIIETSRAGPEGMISGLHREEEI-VDGNLSLDFEYVCKKYGEMH
AmGPPS.SSUI (168) RILRAIIEITRVMGSEGIIEGQYHELGL-NQLN-DLELIEYVCKKYEETTH
SmGPPS.SSUII.1 (174) HLLRVVQELIARAVGSTGMAATQFIGE-----N-----KFCLEIG
OsGPPS.SSUII (184) VLLRVLGLAVSICSEGLVAGQVVDICSEGMTEVGLHEHLEFIHVKHTAAAL
SmGPPS.SSUII.2 (174) RLLRVIAETARAVGSTGMAAGQVLDLEG-GPNA-----VDLVQEKKFGEMG
AtGPPS.SSUII (181) TLLRLITETARTVGTGMAAGQVVDLEG-GPPP-----LSFVQEKKFGAMG
Consensus (256) RILRVI ELARAVGSEGLVAGQ VDL LE LEFV K GAL

```

```

(307) 307      320      330      340      357
SmGPPS (275) CNSCKSIALIAGQTAEVSNLAYEYGNLGLAFQIIDDVLDFTGTSASLG--
SIGPPS (266) SNSCKAIALLAGHSAEVSVLAFDYGNLGLAFQLIDDVLDFTGTSATLG--
CrGPPS (271) SNSCKAIALLAGQTSVAMLAYEYGNLGLAFQLIDDVLDFTGTSASLG--
SmGPPS.LSU (235) QGSEVVMGAILGGKEEVEVERLKFACIKGLMFGVVDIILDVTKSSHELGKT
MpGPPS.LSU (268) QGSEVVLGAILGGKEEVEVAKLRFANCIGLFGVVDIILDVTKSSKELGKT
AmGPPS.LSU (263) EASEVVLGAILGGKDDDEVEKLRKFARCIIGLFGVVDIILDVTKSSQELGKT
SmGPPS.SSUI (229) AAGAAAGAILLAGAEEIQLKRNFGHYAGTIGLLHKKIDTP-----
MpGPPS.SSUI (231) AAGAACGAILGGAAEEIQLKRNFGLYQGTIRGMMEMKNSHQ-----
AmGPPS.SSUI (217) AAGAACGAILGGCDEDEKIEKLRFGLYVGTVQGLLGGK---NR-----
SmGPPS.SSUII.1 (207) RCSAVCGALLGGSDIEIERGEYGRIVGIIYRVVEIMLEGK-----
OsGPPS.SSUII (233) ECSAACGALLGGGPDIEAALRYGRITGVIIYVLDVDIRSAS-----
SmGPPS.SSUII.2 (219) ECSAVCGLLLAGSDDIEIHLRKYGRAVGIYEVVDIIRETKLQPD-----
AtGPPS.SSUII (226) ECSAVCGLLLAGGTTEDLQSLRKYGRAVGMIIYVVDIITEDKKKSY-----
Consensus (307) CSA GAILGGA EEEI KLRKYGR IGLLQVVDDILD T S
*****

```

```

(358) 358      370      380      390      408
SmGPPS (324) ----KGSLSDIRHGIVTAPILFAIEYPELRKIVDQGEKSSNVDRLEI
SIGPPS (315) ----KGSLSDIRHGIVTAPILYAMIEFPQLRTLVDRGDDPVNVEIALDY
CrGPPS (320) ----KGSLSDIRHGIVTAPILFAIEFPPELRAVVDEGFENPYNVLDLALHY
SmGPPS.LSU (286) AGKDLVADKTTYPKLLGVQKSKEFADDNREIQEQQLHFDSHK----AAP
MpGPPS.LSU (319) AGKDLVADKTTYPKLLGVEKSKEFADRNREIQEQQLHFPHR----AAP
AmGPPS.LSU (314) AGKDLVADKTTYPKLLGIEKSREFAKNREIQEQLEGDSVK----AAP
SmGPPS.SSUI (271) -----QIQN-VIGKDKDLKLEEGFHGKN--VELLCS
MpGPPS.SSUI (276) -----LIDENIIGKKELELEGGFHGKN--AELMSS
AmGPPS.SSUI (253) -----SGFEGRIKKELEAVKELESFGGEK--IELIRG
SmGPPS.SSUII.1 (249) -----K-----VNIGVVDIKSRKKEIYMEPEKYG---DKVLP
OsGPPS.SSUII (275) -GNGKMRNASVLRALGMDRALGIVEDKAQKMEADRFGDKYG--ERVLV
SmGPPS.SSUII.2 (265) EKDKSKSKGKSYVSVYGVKAMEVADRSQAKKELESLEKYG---DKVLP
AtGPPS.SSUII (272) DGGAEK--G-----MMEMAEKKEKKEIQVSDNKYGGGDTLVE
Consensus (358) I L IEEK A EL FD E L P

```

```

(409) 409      420      430      440      459
SmGPPS (370) SKSSGIQRAELAAKHARLASAAIDALPENEDVQSRMRALVELTHIVI
SIGPPS (361) GKSRGIQRTRELARKHASLASAAIDSLPESDDEEVQSRMRALVELTHRVI
CrGPPS (366) GKSRGIQRTELAIKHANLASDAIDSLPVTDDHVLRSRRALVELTQRVI
SmGPPS.LSU (332) IAIANVIAYNN-----
MpGPPS.LSU (365) IAIANVIAYRN-----
AmGPPS.LSU (360) IAIANVIAYRN-----
SmGPPS.SSUI (301) VADASLCEAELEV-----
MpGPPS.SSUI (304) VAEPSLYAA-----
AmGPPS.SSUI (287) VFELEHSLAGV-----
SmGPPS.SSUII.1 (279) HTFFIDVAREV-----
OsGPPS.SSUII (323) YSFVDVAVRGFELQDAATTP-----
SmGPPS.SSUII.2 (313) YSFVDVADYFGFEELV-----
AtGPPS.SSUII (310) YTFVDVAKHGFLLPL-----
Consensus (409) L A Y A R

```

```

(460)
SmGPPS (421) TRTK
SIGPPS (412) TRTK
CrGPPS (417) TRRK
SmGPPS.LSU (345) ----
MpGPPS.LSU (378) ----
AmGPPS.LSU (373) ----
SmGPPS.SSUI (315) ----
MpGPPS.SSUI (314) ----
AmGPPS.SSUI (298) ----
SmGPPS.SSUII.1 (291) ----
OsGPPS.SSUII (345) ----
SmGPPS.SSUII.2 (332) ----
AtGPPS.SSUII (327) ----
Consensus (460)

```



**Figure S10. Sequence alignment of GPPS proteins from *S. miltiorrhiza* and various other plants.** GPPS proteins included are *Solanum lycopersicum* SIGPPS (ABB88703), *Catharanthus roseus* CrGPPS (ACC77966), *Mentha x piperita* MpGPPS.LSU (AF182828), *Antirrhinum majus* AmGPPS.LSU (AAS82860), MpGPPS.SSUI (AF182827), AmGPPS.SSUI (AAS82859), rice OsGPPS.SSUII (EAY87007), *Arabidopsis thaliana* AtGPPS.SSUII (At4g38460), and five *S. miltiorrhiza* GPPSs. The FARM (the first aspartate-rich motif, DDLPCMD), SARM (the second aspartate-rich motif, DDXXD) and CXXXC motifs are indicated by ‘\*\*\*’.

```

(1) 1 10 20 30 40 54
SmGGPPS1 (1) -----MRMNI VDAWVQLSIFKQPCPSKSLVGF IHHRFEPVFLKS-RK
SmGGPPS2 (1) -----MAFVATSPISKTNCLKLDLTHQQP
SmGGPPS3 (1) MSRTTVIPSRFRHPKRCRFPQIRRNLTQNHPSPTPKKQKQFLEQNCHWPEVF
AtGGPPS (1) -----VAVVTGSWIVVHHHHHHSSILTKSRSRSCITLTKEPISFRS
CsGGPPS (1) -----MSVNI GSWVHTSSVISQATRSRSKSKP SFSVSIPFYRN-SK
Consensus (1) M SV L W S S LK PL L L K

(55) 55 60 70 80 90 108
SmGGPPS1 (45) RISSHGVSAVLTGEEARVSTRDDAP---FNENAYVVEKANHNKALNDAAVAV
SmGGPPS2 (28) QTRISCNKTTPTSSSIEMQQTLLKISPN---FKFEEDASKAKKVNALDDAVPI
SmGGPPS3 (55) GWLPPPLTHKLTHTPIRFTSNTPDQNKLVFPPKAYLEKIAAVNAALAAALPL
AtGGPPS (46) TVSSSSSI VSSSVVTKEDNLRQSEPS--SFDRMSYITKAELVNKALNSAVPL
CsGGPPS (45) RSVSYVSAIVTKDEETIQEEENKSSSSSLGF EKSYVQKASAINQALEAAVSL
Consensus (55) RTVS S V TS I QR FDF AYMV KA VN ALDAAVPL

(109) 109 120 130 140 150 162
SmGGPPS1 (95) RNFPMHDA MRYSLLAGGKRVPMCLACEIVGGPQEAAPACAEEMIHMS
SmGGPPS2 (78) QNPKHQAMRYSLLAGGKRVFVCLACEIVGGGEAAAVPMACAEEMIHMS
SmGGPPS3 (109) RPAKLEHAMRYSLLAGGKRVFIVCLACEIVGGEDAAAMPACAEEMIHMS
AtGGPPS (98) RPKLHAMRYSLLAGGKRVFVCLACEIVGGESTAMPACAEEMIHMS
CsGGPPS (99) RPKLHAMRYSLLAGGKRVFALCLACEIVGGDESMAMPACAEEMIHMS
Consensus (109) R PLKIHAMRYSLLAGGKRVFVLC LAACELVGGEE SAAMPACAVEMIHMS
*****

(163) 163 170 180 190 200 216
SmGGPPS1 (149) LIHDDLPCMDNDLRRGPTNHKVFGEDEVAVLAGDALLAFAFEFMATTTG--V
SmGGPPS2 (132) LIHDDLPCMDNDLRRGPTICHNEFGEEAVLAGDALLAFAFEVAAKTRN--V
SmGGPPS3 (163) LIHDDLPCMDNDLRRGPTNHKVFGEPAAVLAGYALISAFEFIAATTEG--V
AtGGPPS (152) LIHDDLPCMDNDLRRGPTNHKVFGEDEVAVLAGDALLSFAFELASMTSSDVV
CsGGPPS (153) LIHDDLPCMDNDLRRGPTNHIVFGENVAVLAGDALLAFAFEFIAVSTLN--V
Consensus (163) LIHDDLPCMDNDLRRGKPTNHKVFGEDEVAVLAGDALLAFAFEFIAAT V
*****

(217) 217 230 240 250 260 270
SmGGPPS1 (201) AERILAVGELAKAIGTEGVAGQVVDINCTG--DANVGLDLEFIHHTAA
SmGGPPS2 (184) DERRVQIIVEGSAVCGSEG VAGQIVDSSG---KLLSLGLEYIHVHHTSK
SmGGPPS3 (215) PAERTLVIGEVRLGAEGVVAGQVVDIRSGG--GGDDVGLKLEYIHVHHTAA
AtGGPPS (206) SIVRVRAVGE LAKAIGTEGVAGQVVDISSEGLDLNDVGLHLEFIHHTAA
CsGGPPS (205) SIVRIVGEGELAKAIGTEGVAGQVVDICSG--LSEVDLKLEFIHHTAK
Consensus (217) SP RIVRAVGE LAKAIGTEGLVAGQVVDL SEG DVGLE LEFIHHTAA

(271) 271 280 290 300 310 324
SmGGPPS1 (253) LLEASVVLGAILGGSSDQIEKLRTRFARKIGL FQVVDLILVTKSSEELGKTA
SmGGPPS2 (235) LLEAAVVGAILMGGGGGAQVEALRKYARC VGLFQVVDLILVTKTSEELGKTA
SmGGPPS3 (268) AVFAAVVAVGAILGGACEEFIGNVRIYARRAGL FQVVDLILVTKSTELGKTA
AtGGPPS (260) LLEASAVVRAVGGSSDDEIERTRRFARKIGL FQVVDLILVTKSSEELGKTA
CsGGPPS (257) LLEGAVVLGAILMGGSTDEEVKLRKYARDIGL FQVVDLILVTKSQELGKTA
Consensus (271) LLEAAVVLGAILGGGS DDEIEKLRKYAR IGLFQVVDLILVTKSSEELGKTA
*****

(325) 325 330 340 350 360 378
SmGGPPS1 (307) GKDLAVDKTYPKILGIDKAMEFAEPLNEBAKALACFDFSKAAPLIALDNYIA
SmGGPPS2 (289) GKDLVTKATYPRILGIRKAKDEAADLAAMAVQELSYFDSRAAPLYHLQYIA
SmGGPPS3 (322) GKDVATGKATYPKILGVKSRVAVNLKRAAEQLLGFERGRAPLMLLDNYIA
AtGGPPS (314) GKDLIADKLTYPKILGIEKSRFAERLNREARDQLLGFSDKVAPLLALNYIA
CsGGPPS (311) GKDLVAKVTYPKILNGIEKSRFAEKLNRKRAAEQLACFDFSKAAPLIALNYIA
Consensus (325) GKDLV DK TYPKLMGLEKSRFAEKLNR EA EQLAGFDP KAAPLIALNYIA

(379)
SmGGPPS1 (361) H RQN
SmGGPPS2 (343) S RQN
SmGGPPS3 (376) Y RDK
AtGGPPS (368) Y RQN
CsGGPPS (365) Y RQN
Consensus (379) Y RQN

```

**Figure S11. Sequence alignment of GGPPS proteins from *S. miltiorrhiza* and various other plants.** GGPPS proteins included are *A. thaliana* AtGGPPS (AAM65107), *Croton sublyratus* CsGGPPS (BAA86284), and three *S. miltiorrhiza* SmGGPPSs. The FARM (the first aspartate-rich motif, DDLPCMD), SARM (the second aspartate-rich motif, DDXXD) and CXXXC motifs are indicated by “\*\*\*”.

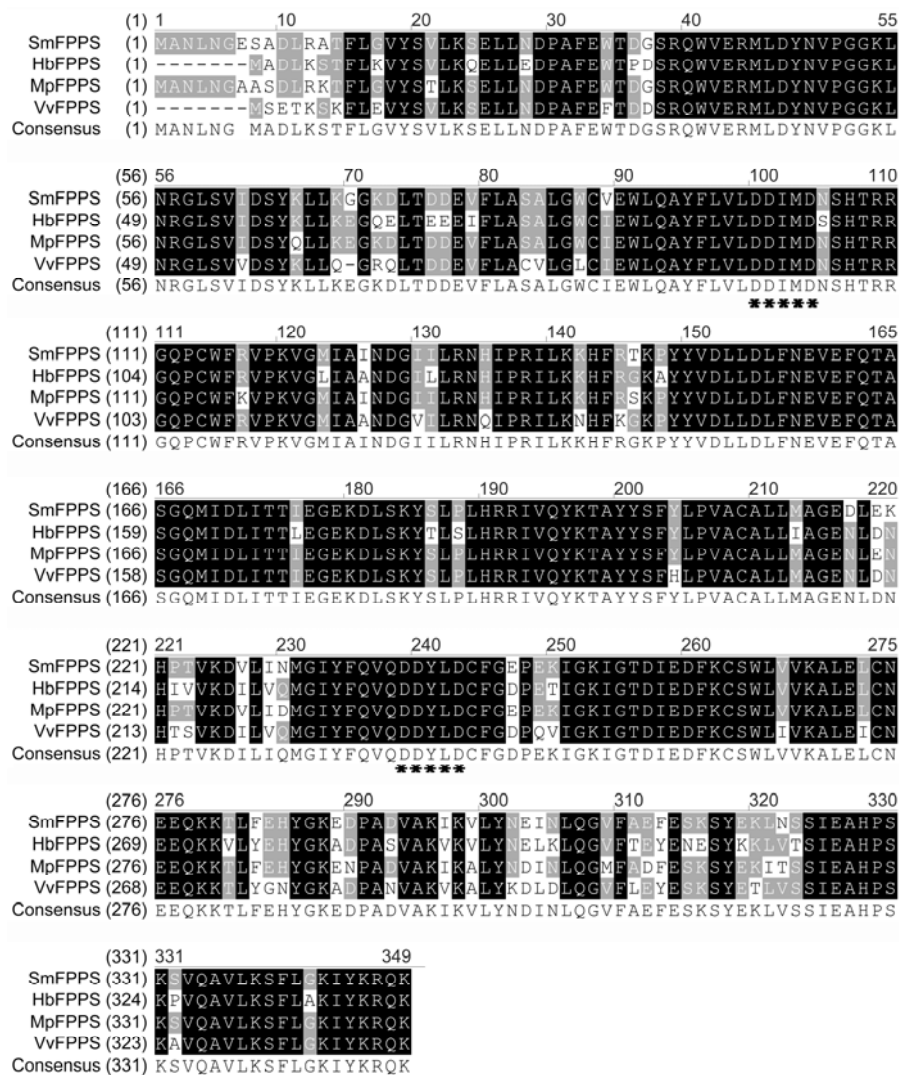

**Figure S12. Sequence alignment of FPPS proteins from *S. miltiorrhiza* and various other plants.** FPPS proteins included are *Hevea brasiliensis* HbFPPS (AAM98379), *Mentha x piperita* MpFPPS (AF384040), *Vitis vinifera* VvFPPS (AAX76910), and the *S. miltiorrhiza* SmFPPS. The FARM (the first aspartate-rich motif, DDIMD) and SARM motifs (the second aspartate-rich motif, DDXD) are indicated by ‘\*\*\*’.

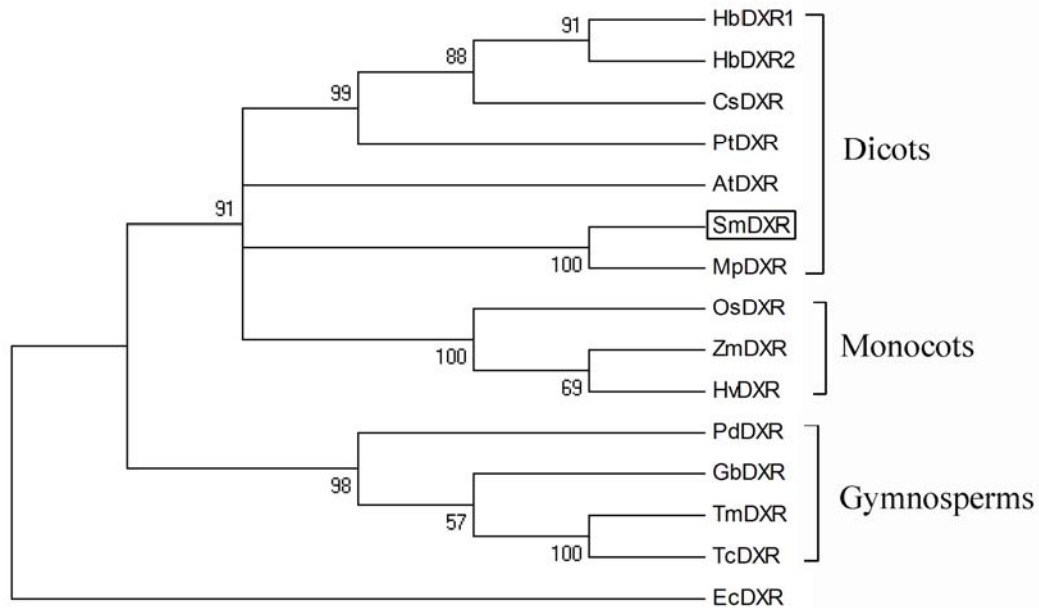

**Figure S13. Phylogenetic relationships of DXRs from *S. miltiorrhiza* and various other plants.** DXR proteins included are *S. miltiorrhiza* SmDXR (ABJ80680), *Hevea brasiliensis* HbDXR1 (AAS94121), HbDXR2 (ABF18928), *A. thaliana* AtDXR (AED97658), *Populus trichocarpa* PtDXR (XP\_002318048), *Zea mays* ZmDXR (CAC03581), *Mentha × piperita* MpDXR (AF116825), rice OsDXR (AF367205), *H. vulgare* HvDXR (CAE47438), *C. stellatopilosus* CsDXR (ABO38177), *P. densiflora* PdDXR (ACC54558), *G. biloba* GbDXR (AAR95700), *Taxus x media* TmDXR (AAU87836), and *T. cuspidate* TcDXR (AAT47184). *E. coli* EcDXR (NP\_414715) was used as an out group.

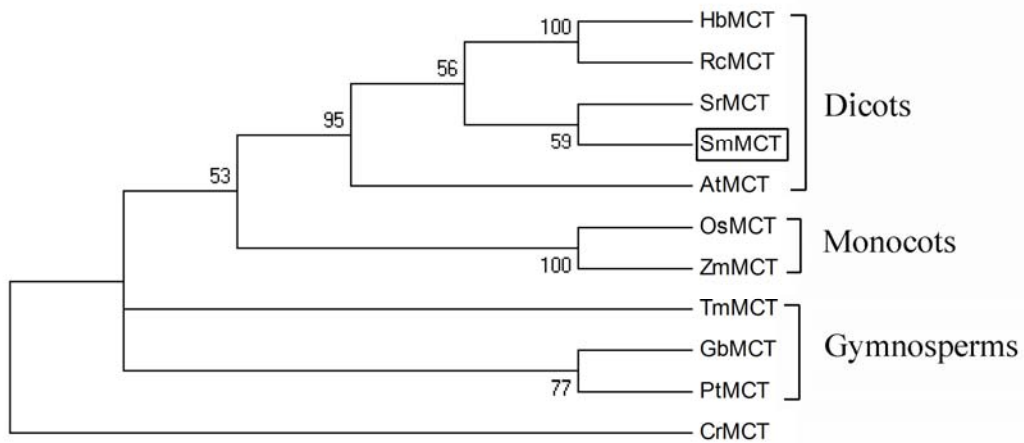

**Figure S14. Phylogenetic relationships of MCTs from *S. miltiorrhiza* and various other plants.** MCT proteins included are *S. rebaudiana* SrMCT (ABB88837), *S. miltiorrhiza* SmMCT (JN831096), *A. thaliana* AtMCT (NP\_565286), *H. brasiliensis* HbMCT (BAF98291), *R. communis* RcMCT (XP\_002519366), rice OsMCT (BAD82245), *Z. mays* ZmMCT (NP\_001140440), *Taxus x media* TmMCT (ABU48538), *G. biloba* GbMCT (AAZ80386), and *P. sitchensis* PtMCT (ACN40114). *E. coli* EcMCT (XP\_001698942) was used as an out group.

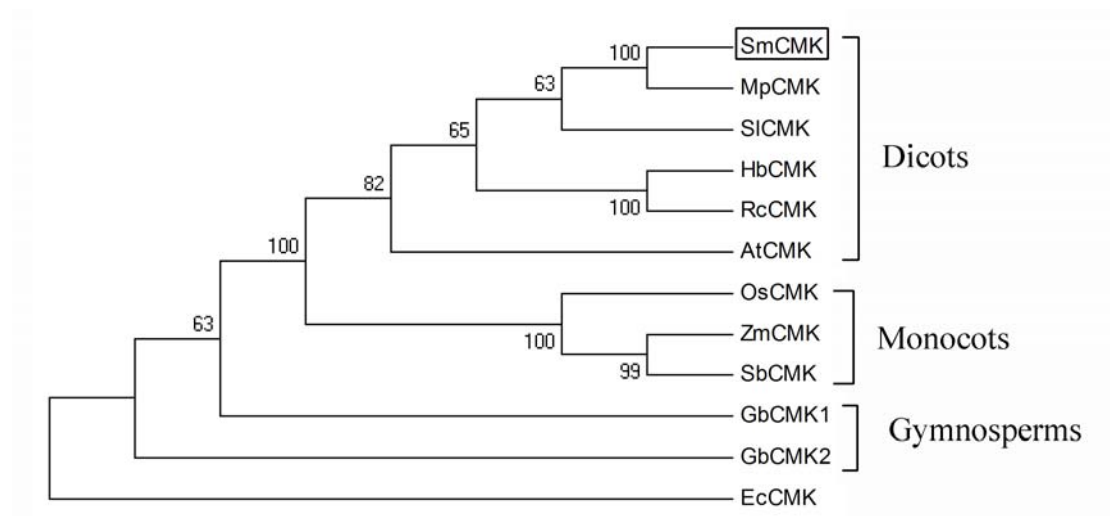

**Figure S15. Phylogenetic relationships of CMKs from *S. miltiorrhiza* and various other plants.** CMK proteins included are *G. biloba* GbCMK1 (AAZ80384), GbCMK2 (DQ102359), *A. thaliana* AtCMK (BT000208), *L. esculentum* LeCMK (AAB49936), *S. miltiorrhiza* SmCMK (ABP96842), rice OsCMK (NP\_915832), *Z. mays* ZmCMK (NP\_001149138), *S. bicolor* SbCMK (XP\_002456497), *M. piperita* MpCMK (CAB65292), *H. brasiliensis* HbCMK (BAF98293), and *R. communis* RbCMK (XP\_002523216). *E. coli* EcCMK (NP\_415726) was used as an out group.

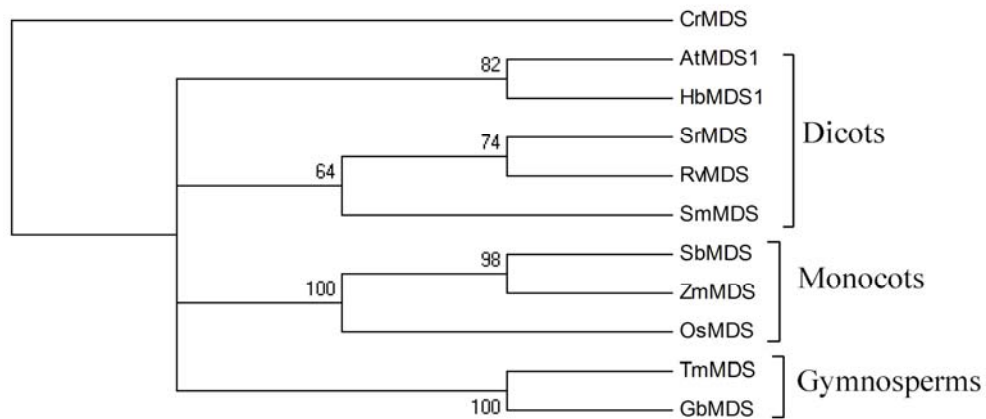

**Figure S16. Phylogenetic relationships of MDSs from *S. miltiorrhiza* and various other plants.** MDS proteins included are SrMDS (*S. rebaudiana*, ABG23395), RvMDS (*R. verticillata*, ABV89583), HbMDS1 (*H. brasiliensis*, BAF98294), AtMDS1 (*A. thaliana*, NP\_850971), OsMDS (*O. sativa*, BAD29384), SbMDS (*S. bicolor*, XP\_002452756), ZmMDS (*Z. mays*, NP\_001150687), GbMDS (*G. biloba*, ABL77405), TmMDS (*Taxus x media*, ABU48537), and *S. miltiorrhiza* SmMDS (JN831097). CrMDS (*C. reinhardtii*, XP\_001690985) was used as an out group.

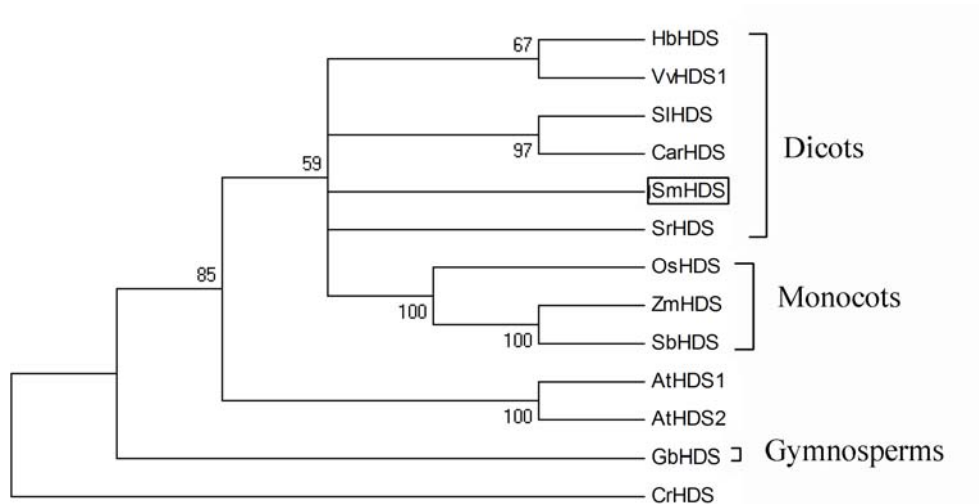

**Figure S17. Phylogenetic relationships of HDSs from *S. miltiorrhiza* and various other plants.** HDS proteins included are AtHDS1 (*A. thaliana*, NP\_200868.2), HbHDS (*H. brasiliensis*, BAF98296), AtHDS2/GcpE protein (BAB09833), CarHDS (*C. roseus*, AAO24774), GbHDS (*G. biloba*, ABB78087), VvHDS1 (*V. vinifera*, XP\_002285130), SIHDS (*S. lycopersicum*, AF435086), SrHDS (*S. rebaudiana*, ABG75916.2), OsHDS (*O. sativa*, AAO72576), ZmHDS (*Z. mays*, ACL53652), SbHDS (*S. bicolor*, XP\_002454137), and *S. miltiorrhiza* SmHDS (JN831098). CrHDS (*C. reinhardtii*, XP\_001690937) was used as an out group.



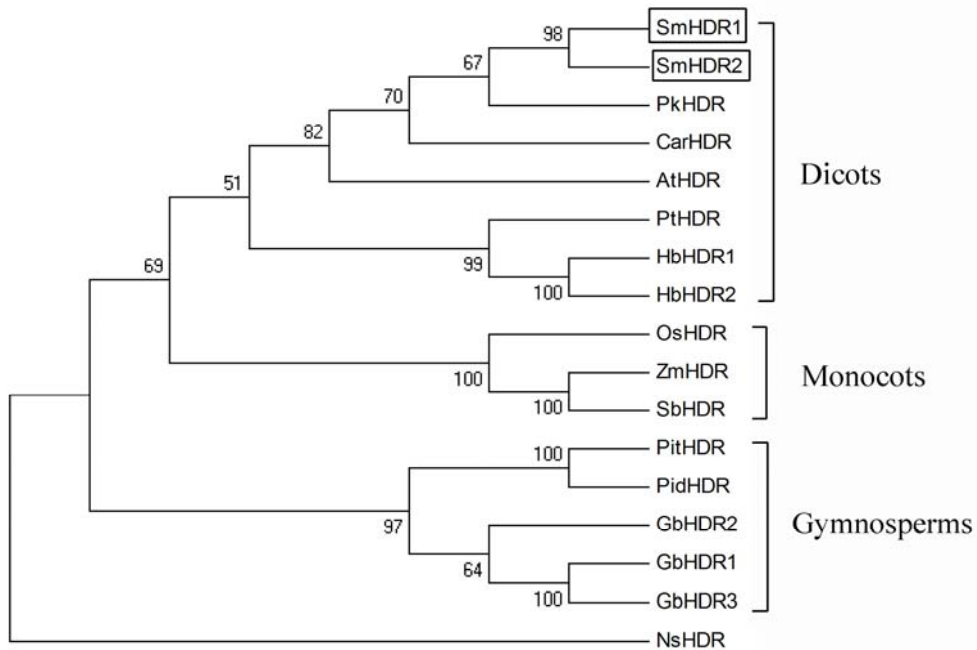

**Figure S18. Phylogenetic relationships of HDRs from *S. miltiorrhiza* and various other plants.** HDR proteins included are PtHDR (*P. trichocarpa*, XP\_002305413), HbHDR1 (*H. brasiliensis*, ACG55683), HbHDR2 (*H. brasiliensis*, BAF98297), AtHDR (*A. thaliana*, NP\_567965), CarHDR (*C. roseus*, ABI30631), PkHDR (*P. kurrooa*, ABM89226), PitHDR (*P. taeda*, ABO26588), PidHDR (*P. densiflora*, ACC54561), GbHDR1 (*G. biloba*, ABC84344), GbHDR2 (*G. biloba*, ABB78089), GbHDR3 (*G. biloba*, ABB78090), OsHDR (*O. sativa*, NP\_001051167), ZmHDR (*Z. mays*, NP\_001169300), SbHDR (*S. bicolor*, XP\_002463933), and two *S. miltiorrhiza* SmHDRs. NsHDR (*Nostoc* sp. PCC 7120, NP\_485028) was used as an out group.

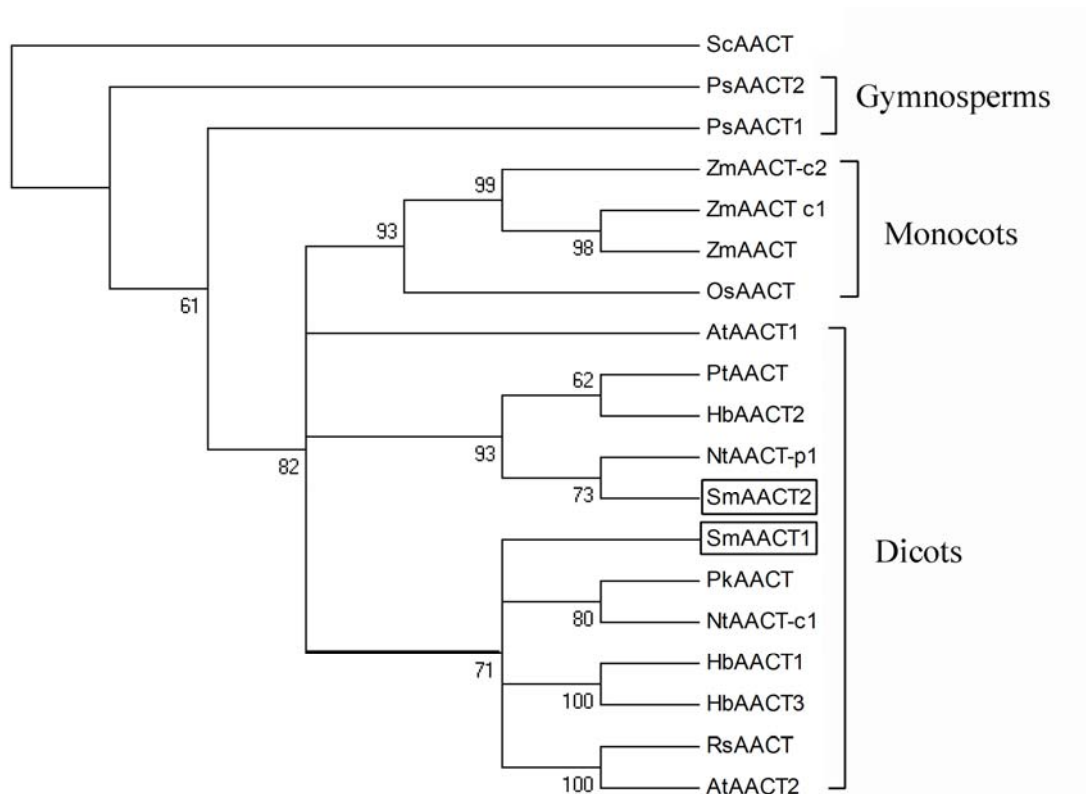

**Figure S19. Phylogenetic relationships of AACTs from *S. miltiorrhiza* and various other plants.** AACT proteins included are ZmAACT (*Z. mays*, ACF85124), ZmAACT-c1 (ACG34735), ZmAACT-c2 (NP\_001148667), OsAACT (*O. sativa*, NP\_001041797), AtAACT1 (*A. thaliana*, AT5G47720), AtAACT2 (AT5G48230), PtAACT (*P. sitchensis*, XP\_002308755), HbAACT1 (*H. brasiliensis*, BAF98276), HbAACT2 (AF429383), HbAACT3 (BAF98277), RsAACT (*R. sativus*, CAA55006), PkAACT (*P. kurrooa*, ABC74567), PsAACT1 (*P. sitchensis*, ACN40771), PsAACT2 (ACN41149.1), NtAACT-c1 (*N. tabacum*, AAU95618), NtAACT-p1 (AAU95619), and two *S. miltiorrhiza* SmAACTs. ScAACT (*S. cerevisiae*, P41338.3) was used as an out group.

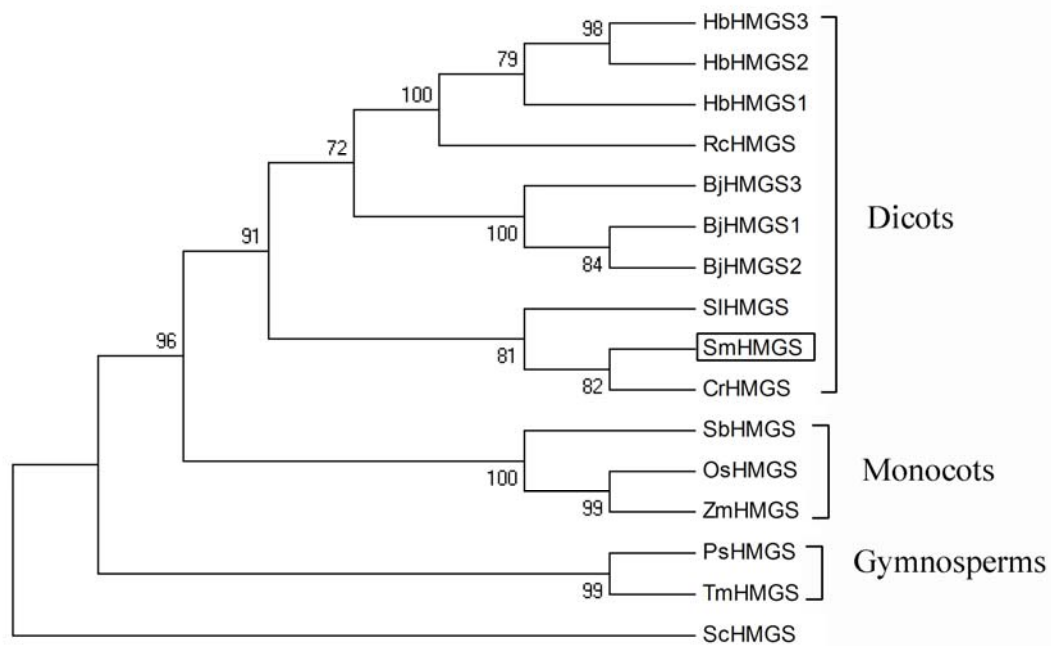

**Figure S20. Phylogenetic relationships of HMGs from *S. miltiorrhiza* and various other plants.** HMGs proteins included are BjHMGS1 (*B. juncea*, AF188639), BjHMGS2 (AF188640), BJHMGS3 (AF148847\_1), OsHMGS (*O. sativa*, Os08g0544900), SIHMGS (*S. lycopersicum*, ABX55778), HbHMGS1 (*H. brasiliensis*, AF429389), HbHMGS2 (AAS46245.1), HbHMGS3 (BAF98279), TmHMGS (*Taxus x media*, AAT73206), CrHMGS (*C. roseus*, AEC13715), PsHMGS (*P. sylvestris*, CAA65250), SmHMGS (*S. miltiorrhiza*, ACV65039), RcHMGS (*R. communis*, XP\_002509692), SbHMGS (*S. bicolor*, XP\_002468628), ZmHMGS (*Z. mays*, ACG33137). ScHMGS (*S. cerevisiae*, P54839) was used as an out group.

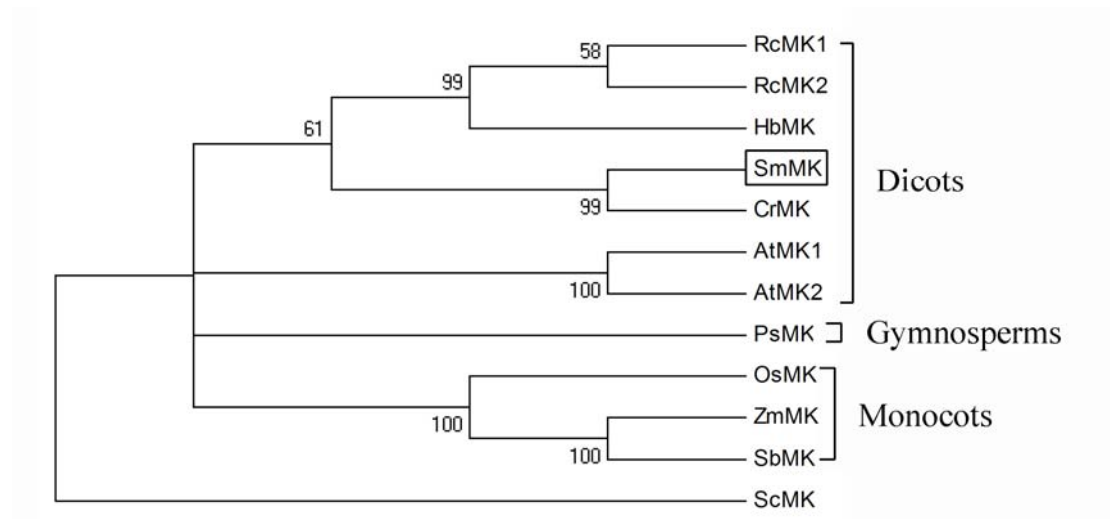

**Figure S21. Phylogenetic relationships of MKs from *S. miltiorrhiza* and various other plants.** MK proteins included are OsMK (*O. sativa*, Os10g0329300), AtMK1 (*A. thaliana*, NP\_198097), AtMK2 (L77688), HbMK (*H. brasiliensis*, AF429384), ZmMK (*Z. mays*, ACG46416), PsMK (*P. sitchensis*, ACN40231), SbMK (*S. bicolor*, XP\_002453181), RcMK1 (*R. communis*, XP\_002512365), RcMK2 (XP\_002529655), CrMK (*C. roseus*, ADR65111), and SmMK (*S. miltiorrhiza*, JN831104). ScMK (*S. cerevisiae*, P24521) was used as an outgroup.

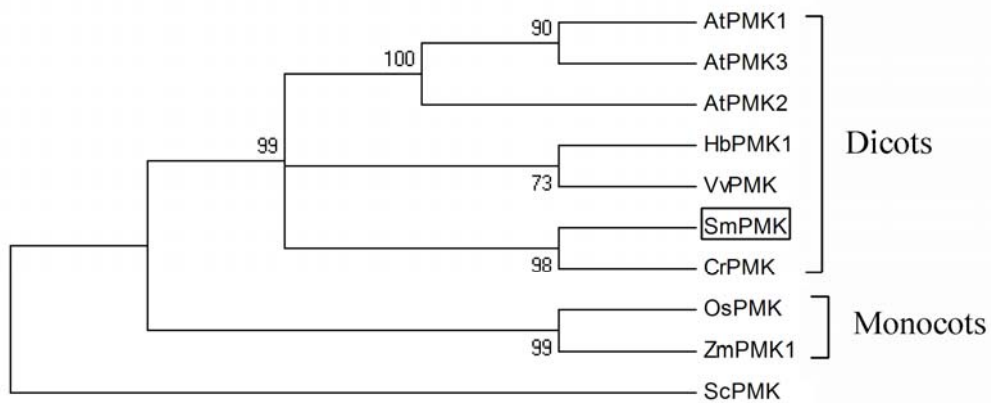

**Figure S22. Phylogenetic relationships of PMKs from *S. miltiorrhiza* and various other plants.** PMK proteins included are OsPMK (*O. sativa*, Os03g0253100), AtPMK1 (*A. thaliana*, NP\_174473), AtPMK2 (NP\_001185124), AtPMK3 (BAD43274), HbPMK1 (*H. brasiliensis*, AF429385), ZmPMK1 (*Z. mays*, ACG35008), VvPMK (*V. vinifera*, XP\_002275808), CrPMK (*C. roseus*, ADR65112), and SmPMK (*S. miltiorrhiza*, JN831095). ScPMK (*S. cerevisiae* RM11-1a, EDV11711) was used as an out group.

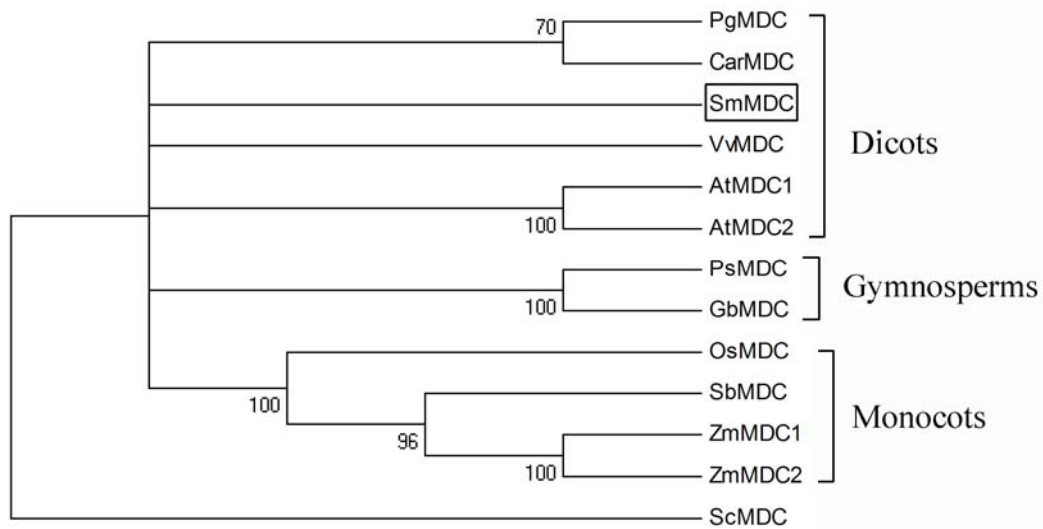

**Figure S23. Phylogenetic relationships of MDCs from *S. miltiorrhiza* and various other plants.** MDC proteins included are VvMDC (*V. vinifera*, CAN82519), AtMDC1 (*A. thaliana*, NP\_181404), AtMDC2 (NP\_566995), ZmMDC1 (*Z. mays*, ACF86239), ZmMDC2 (NP\_001149256), PsMDC (*P. sitchensis*, ACN41090), SbMDC (*S. bicolor*, XP\_002452980), PgMDC (*P. ginseng*, ADI80345), CrMDC (*C. roseus*, ADR65113), OsMDC (*O. sativa*, BAD27942), GbMDC (*G. biloba*, AAV32433), and SmMDC (*S. miltiorrhiza*, JN831105). ScMDC (*S. cerevisiae*, P32377.2) was used as an out group.

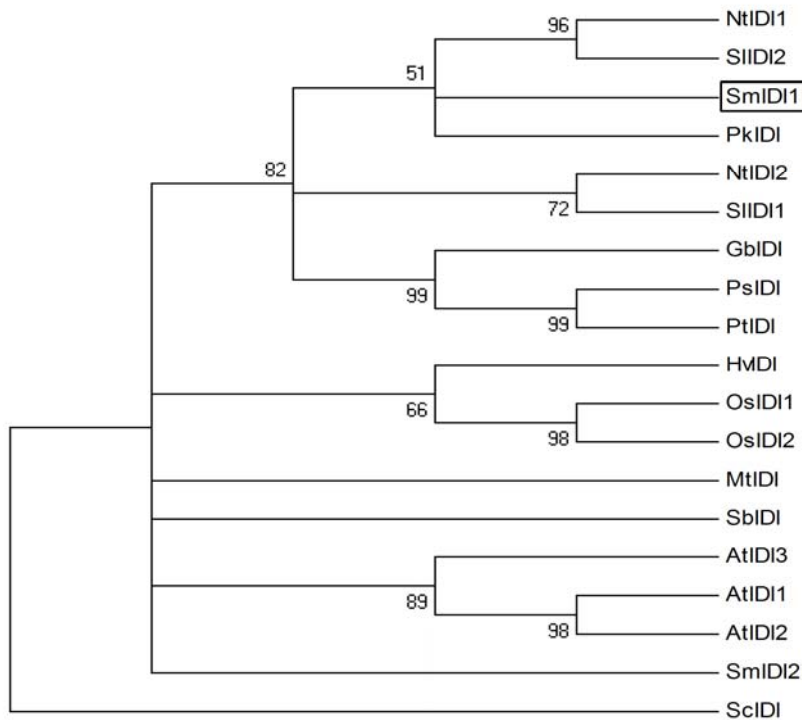

**Figure S24. Phylogenetic relationships of IDIs from *S. miltiorrhiza* and various other plants.** IDI proteins included are AtIDI1 (*A. thaliana*, AF188066), AtIDI2 (NP\_186927), AtIDI3 (AF188067), GbIDI (*G. biloba*, ACU56979), MtIDI (*M. truncatula*, ACJ84381), NtIDI1 (*N. tabacum*, BAB40973), NtIDI2 (BAB40974), OsIDI1 (*O. sativa*, ABR26078), OsIDI2 (AF188065), PkIDI (*P. kurrooa*, ABO14800), PsIDI (*P. sitchensis*, ACN41037), PtIDI (*P. taeda*, ACU56978), SbIDI (*S. bicolor*, XP\_002439804), SIIDI1 (*S. lycopersicum*, ABX55779), SIIDI2 (ACS34993), HvIDI (*H. vulgare*, BAJ86792), SmIDI1 (*S. miltiorrhiza*, ABV08818) and SmIDI2 (JN831106). ScIDI (*S. cerevisiae*, AAB68245) was used as an out group.

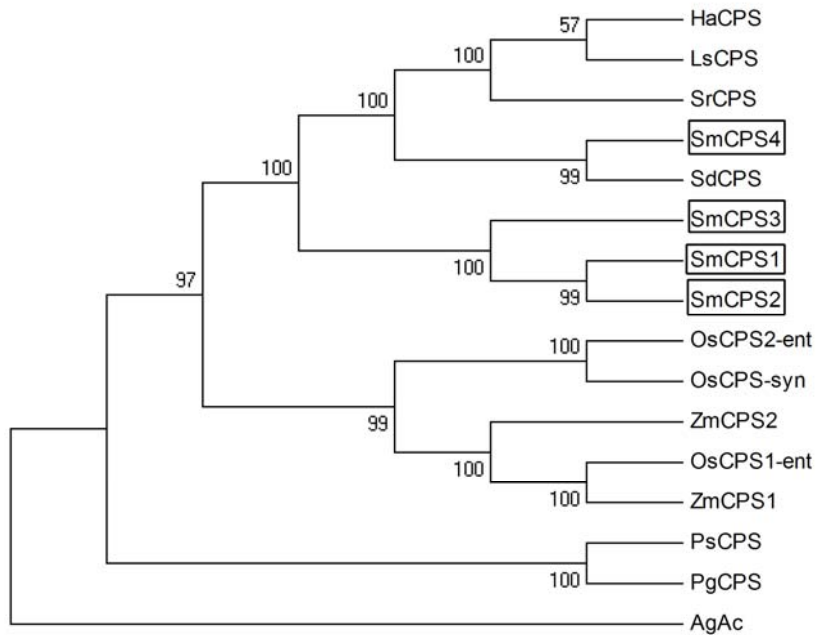

**Figure S25. Phylogenetic relationships of CPSs from *S. miltiorrhiza* and various other plants.** CPS proteins included are HaCPS (*H. annuus*, CBL42915), SrCPS (*S. rebaudiana*, AAB87091), LsCPS (*L. sativa*, BAB12440), SdCPS (*S. dulcis*, BAB03594), PsCPS (*P. sitchensis*, ADB55709), PgCPS (*P. glauca*, ADB55707), OsCPS1-ent (*O. sativa*, BAD42449.2), OsCPS2-ent/OsCyc2 (BAD42452), OsCPS-syn/OsCyc1 (BAD42451), ZmCPS1 (*Z. mays*, AAA73960), ZmCPS2 (AAT70083), SmCPS1 (*S. miltiorrhiza*, ABV57835), SmCPS2 (JN831114), SmCPS3 (JN831115), and SmCPS4 (JN831120). AgAc (*A. grandis*, AAB05407) was used as an outgroup. Sequences upstream of the partially conserved motif SPYDTAWVAL were trimmed.



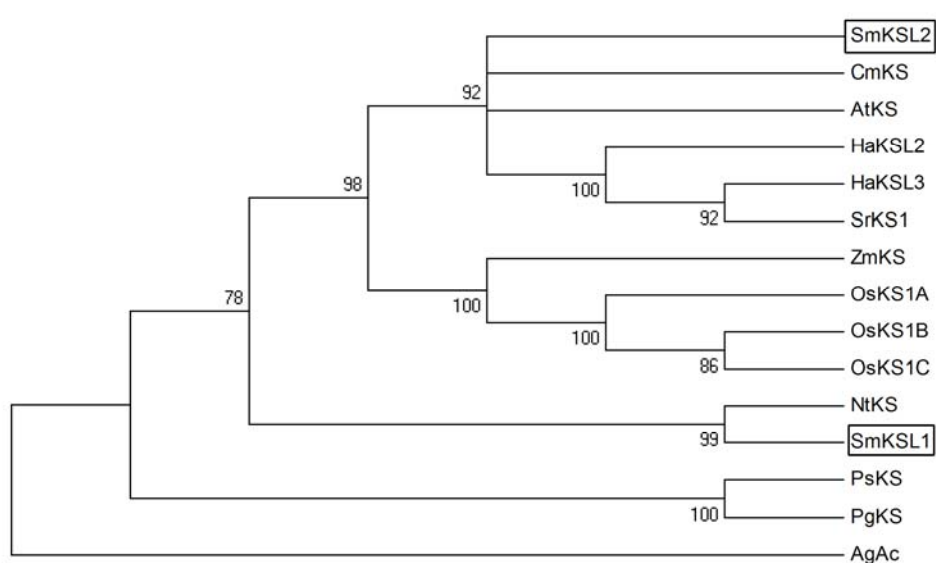

**Figure S26. Phylogenetic relationships of KS and KSLs from *S. miltiorrhiza* and various other plants.** Proteins included are NtKS (*N. tabacum*, AAS98912), SmKS1 (*S. miltiorrhiza*, ABV08817), SmKSL2 (JN831119), HaKSL2 (*H. annuus*, CBL42916), HaKSL3 (CBL42917), SrKS1 (*S. rebaudiana*, AF097310), CmKS (*C. mollissima*, AEF32083), AtKS (*A. thaliana*, AAC39443), PsKS (*P. sitchensis*, ADB55710), PgKs (*P. glauca*, ADB55708), OsKS1A (*O. sativa*, AAQ72559), OsKS1B (AAQ72560), OsKS1C (AAQ72561.1), and ZmKS (*Z. mays*, AF105149). AgAc (*A. grandis*, AAB05407) was used as an out group. About 200 amino acids in the N-terminal of most KS proteins were trimmed because SmKSL1 lacks those sequences.

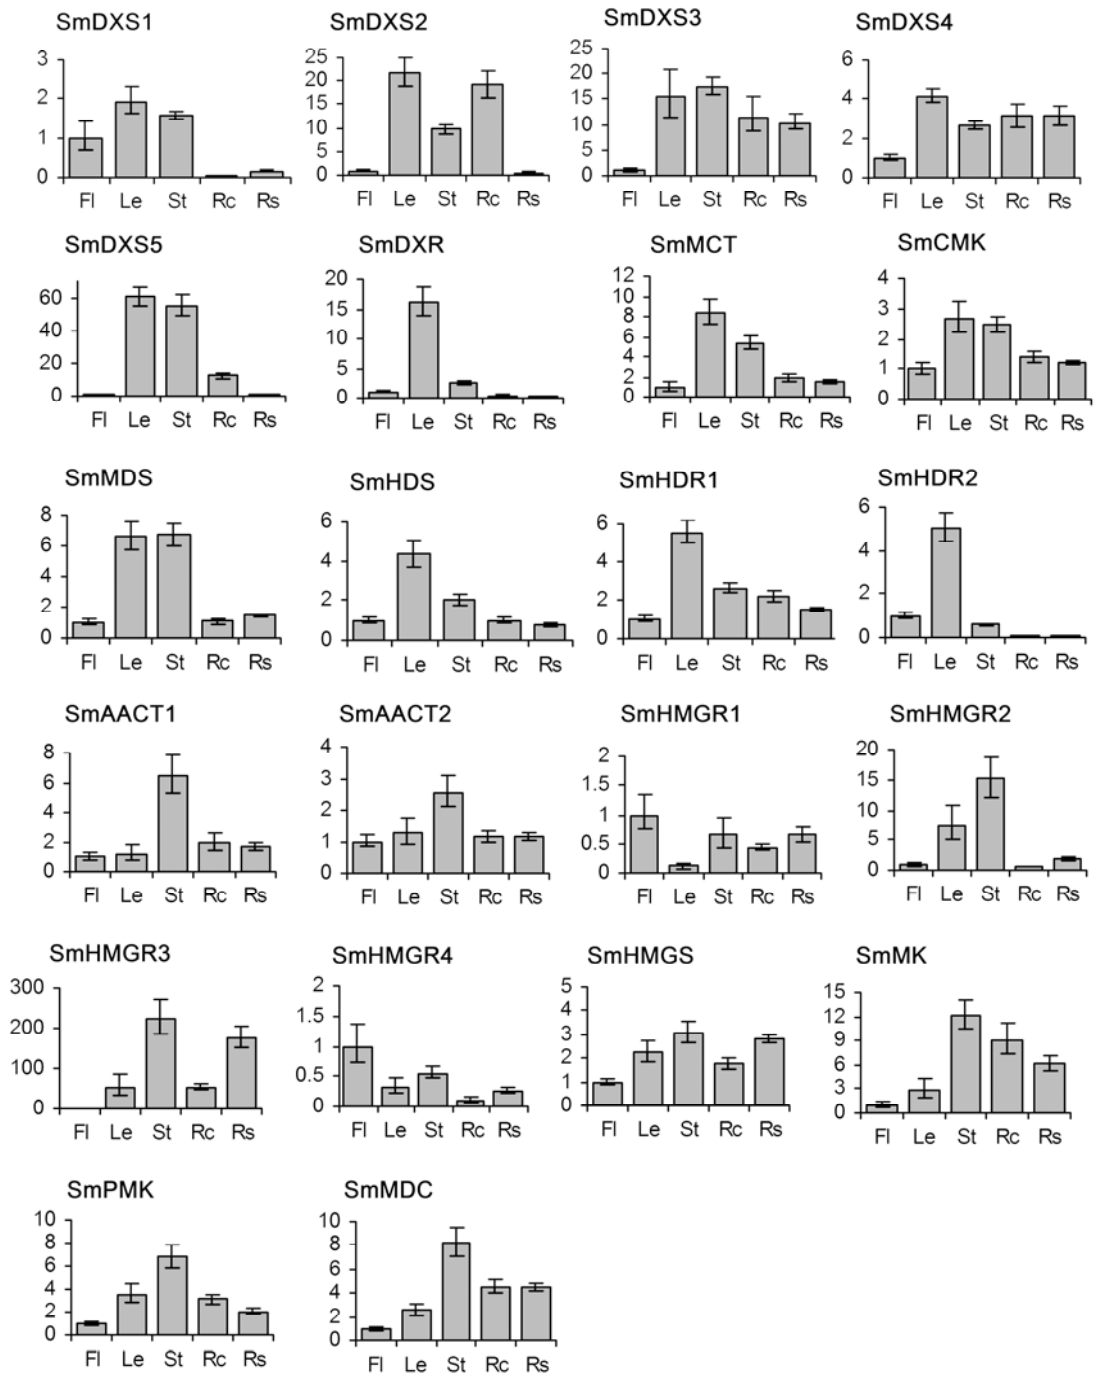

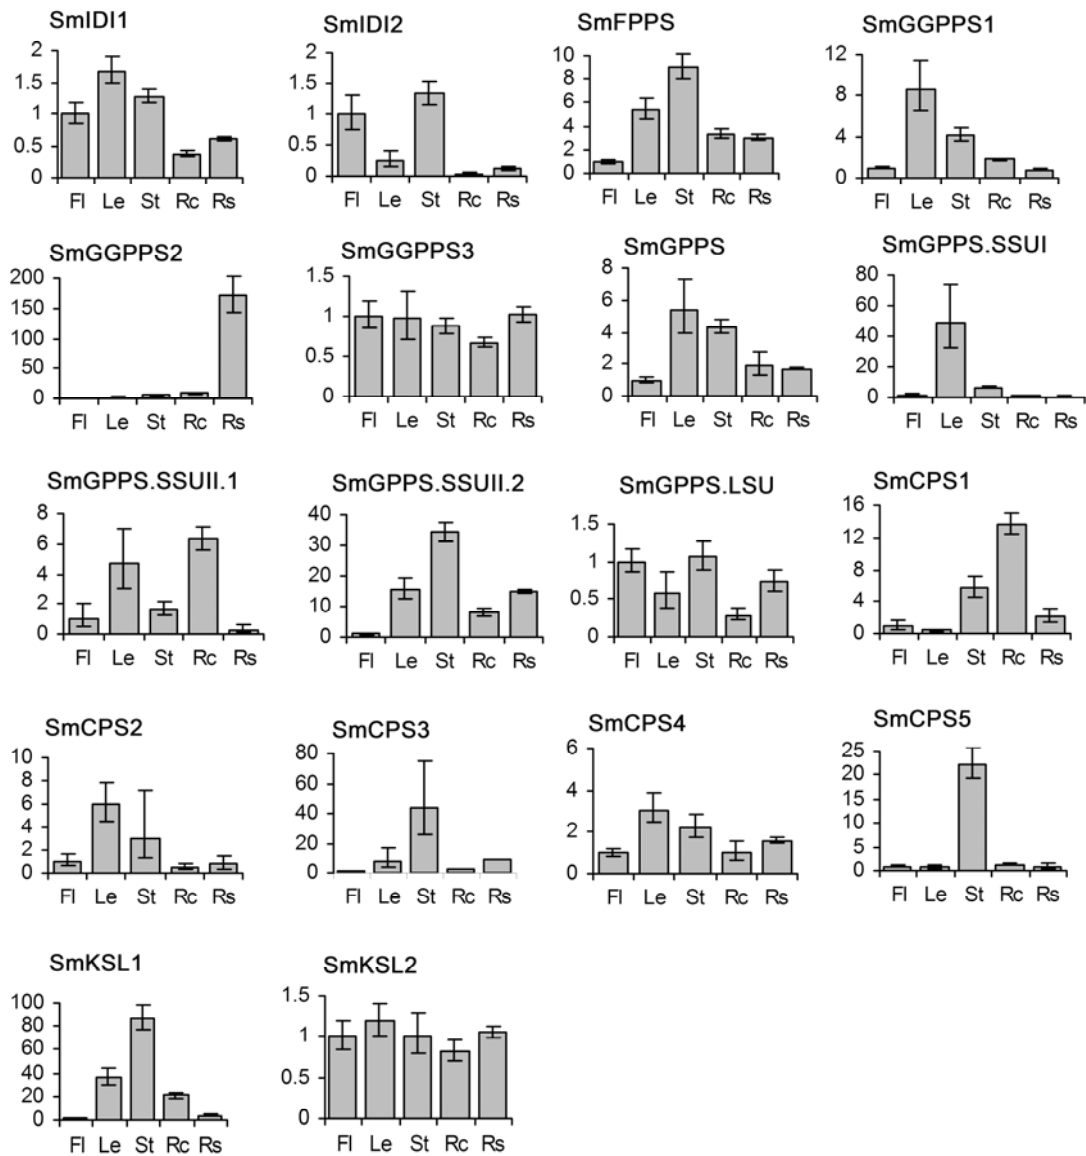

**Figure S27. Expression patterns of forty terpenoid biosynthesis-related genes in various tissues of *S. miltiorrhiza* plants.** Fold changes of transcript levels in flowers (FI), leaves (Le), stems (St), root cortices (Rc) and root steles (Rs) of *S. miltiorrhiza* plants grown in soil are shown. Transcript levels in flowers were arbitrarily set to 1.

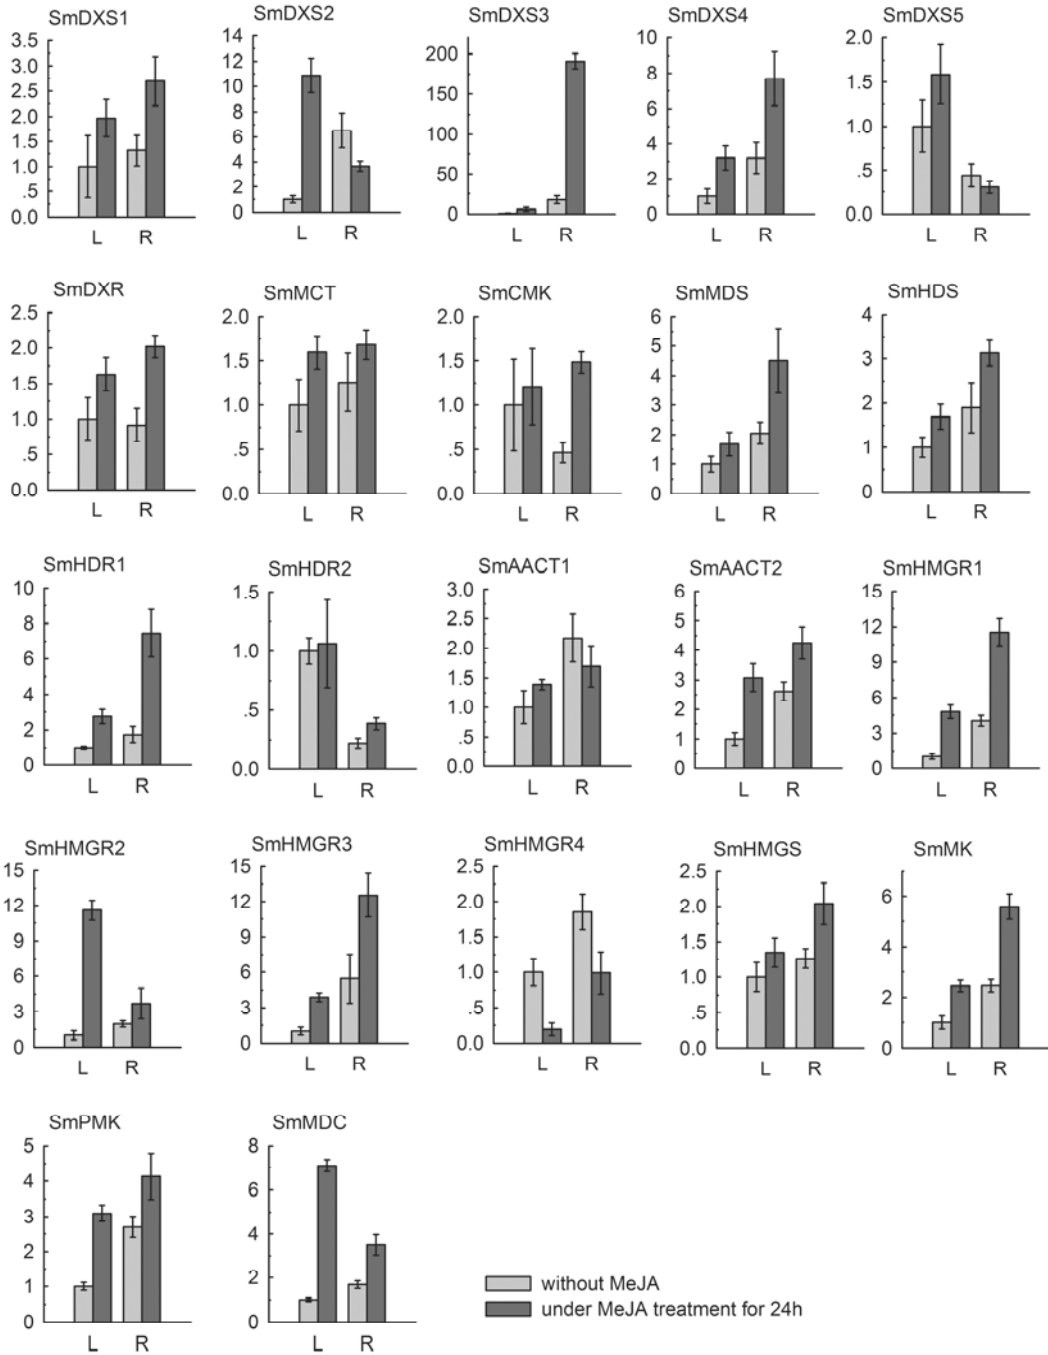

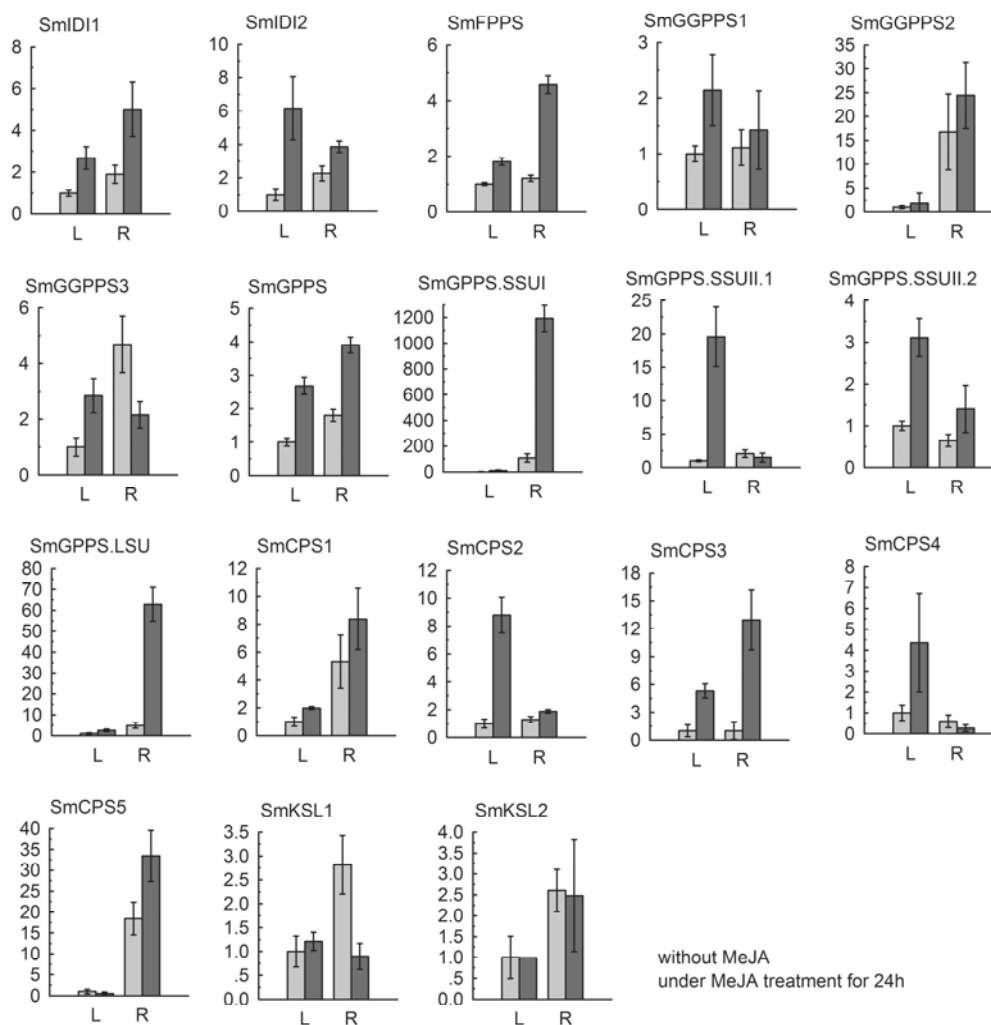

**Figure S28. Expression patterns of forty terpenoid biosynthesis-related genes in *S. miltiorrhiza* plantlets treated with MeJA.** Fold changes of transcript levels in leaves (L) and roots (R) of *S. miltiorrhiza* plantlets treated with MeJA for 0 and 24 hours. Transcript levels in leaves of plantlets without treatment were arbitrarily set to 1.

**Table S1.** Primers used for quantitative real-time RT-PCR.

| Gene name | Primer name | Sequence (5' to 3')        |
|-----------|-------------|----------------------------|
| SmUBQ     | UBQ-F       | agatgggCGGacacttgctgatta   |
|           | UBQ-R       | actctccacctccaaagtgatggt   |
| SmDXS1    | DXS1-F      | catgctcttatacggagcttgcca   |
|           | DXS1-R      | ggcgtgagtcctgcttccatcagt   |
| SmDXS2    | DXS2-F      | cagcgeccatatttctcatttctat  |
|           | DXS2-R      | gaagactgtctttccccaccaat    |
| SmDXS3    | DXS3-F      | ggctccattgggggatttggtca    |
|           | DXS3-R      | cactgaagttgagagcttccatag   |
| SmDXS4    | DXS4-F      | tctctcgacggccttctcgatgct   |
|           | DXS4-R      | catcaagagaagagcgtcgcgggt   |
| SmDXS5    | DXS5-F      | gttggtggctttgatcacacgtt    |
|           | DXS5-R      | tctctaaagcttctctggattccaa  |
| SmDXR     | DXR-F       | tggaggcaccatgaccggagtct    |
|           | DXR-R       | gggccactggcgtagtggatga     |
| SmMCT     | MCT-F       | acctgaaattgcattgcctgggaa   |
|           | MCT-R       | tccttgattgtagccttagcaggaa  |
| SmCMK     | CMK-F       | ccaagagtggcgggtgagattgg    |
|           | CMK-R       | ggggcatgcctcttggcctaata    |
| SmMDS     | MDS-F       | ttggccacggattgaccttcac     |
|           | MDS-R       | tgccctatatctgggagcccaagc   |
| SmHDS     | HDS-F       | cgtggtgacgaacccaagaagag    |
|           | HDS-R       | gccagcaccgataaccaagtcgtc   |
| SmHDR1    | HDR1-F      | ctcagaattgcgtggaattccatca  |
|           | HDR1-R      | ttaagccgattgcaatacttctgctt |
| SmHDR2    | HDR2-F      | atcgtattgggtgacagcgagaaa   |
|           | HDR2-R      | tatgccgtttgcaatacttcacgc   |
| SmAACT1   | AACT1-F     | aaagctctggagctcgggcttaca   |
|           | AACT1-R     | tccaaaccagcattcttgagtgcct  |
| SmAACT2   | AACT2-F     | gcaatggcagttaaacttgattgga  |
|           | AACT2-R     | gagattgctctcggatcgcaatg    |
| SmHMGR1   | HMGR1-F     | caataaggaggctcccggatccaa   |
|           | HMGR1-R     | acttcatgctcgcaacatccttatt  |
| SmHMGR2   | HMGR2-F     | ctcaacctgctgggagtcaggga    |
|           | HMGR2-R     | ttgagagcttagtaacatcttggaa  |
| SmHMGR3   | HMGR3-F     | caataaggaggctcccggatccaa   |
|           | HMGR3-R     | acttcatgctcgcaacatccttatt  |
| SmHMGR4   | HMGR4-F     | tagcatcacaatcggttgcctca    |
|           | HMGR4-R     | ctcgaccggtgtacttcattgga    |
| SmHMGS    | HMGS-F      | aggactgcagccttctgcaccag    |

|                |                |                            |
|----------------|----------------|----------------------------|
|                | HMGS-R         | ttcgcaatggccttcttggcatag   |
| SmMK           | MK-F           | ttcgtctgctgctctttgtgtgc    |
|                | MK-R           | agatggcctcccatggatcatctt   |
| SmPMK          | PMK-F          | tgcattgcatcgctcaaactgctc   |
|                | PMK-R          | tcaattggaatccctcgaccagca   |
| SmMDC          | MDC-F          | agtgttgcgcagcttgtatggt     |
|                | MDC-R          | ctggtttcaaccgtgtcacgcatt   |
| SmIDI1         | IDI1-F         | gcatccaaatccagacgaagtgca   |
|                | IDI1-R         | tttctcgacgtggtcccaccactt   |
| SmIDI2         | IDI2-F         | gtgaagtacgtgagccgcgagcaa   |
|                | IDI2-R         | tttcatgtcagccgcttgggcca    |
| SmGPPS         | GPPS-F         | atacaaggcggggtattggctcttt  |
|                | GPPS-R         | tgcattgtctcaccagtaccaga    |
| SmGGPPS1       | GGPPS1-F       | ctgcattgtagaggcatctgtagttt |
|                | GGPPS1-R       | agcttgggatacgtggtcttctgc   |
| SmGGPPS2       | GGPPS2-F       | ccagattgtggactgtcagcgca    |
|                | GGPPS2-R       | caacacacctggcgtacttctcaa   |
| SmGGPPS3       | GGPPS3-F       | gcgtgcgaggaggagatcgggaat   |
|                | GGPPS3-R       | cctggacttctccactccgatgagt  |
| SmGPPS.SSUI    | GPPS.SSUI-F    | tcacgagcatctccctctgaccga   |
|                | GPPS.SSUI-R    | gctggcccactgatctctattata   |
| SmGPPS.SSUII.1 | GPPS.SSUII.1-F | cgaggccaactacceaacacacat   |
|                | GPPS.SSUII.1-R | tctctgcacgactcgaaggaggt    |
| SmGPPS.SSUII.2 | GPPS.SSUII.2-F | tgacttgcctgcatggatgatgat   |
|                | GPPS.SSUII.2-R | cccactgccttctctatctcagca   |
| SmGPPS.LSU     | GPPS.LSU-F     | gttcgccaagtgcacggcctca     |
|                | GPPS.LSU-R     | agccttgtgagaatcgaagtgaagg  |
| SmFPPS         | FPPS-F         | gcgggtgaggacctggagaaacat   |
|                | FPPS-R         | cagggcctttacaaccagccaagaa  |
| SmCPS1         | CPS1-F         | ccacatgccttcagggaagaaat    |
|                | CPS1-R         | tttatgctcgattcgtcgtatct    |
| SmCPS2         | CPS2-F         | ggtctcatcgccttcaacgaagat   |
|                | CPS2-R         | tccttatcctttatctccatcca    |
| SmCPS3         | CPS3-F         | ggagatgccaattcgaacatcaga   |
|                | CPS3-R         | tcaaataatagttgcggcggccaaa  |
| SmCPS4         | CPS4-F         | cggtgccttgggctacaacaata    |
|                | CPS4-R         | tccttggtagacctctcttcca     |
| SmCPS5         | CPS5-F         | tagaagatgcagctactttctctgct |
|                | CPS5-R         | catcatcttcaccgccgtactgtt   |
| SmKSL1         | KSL1-F         | tggaaacagtgtgacccttctgct   |
|                | KSL1-R         | gcttgcatacaataacaccaatct   |
| SmKSL2         | KSL2-F         | ttagtttggagggcaagaagagtgt  |
|                | KSL2-R         | ctcctgttggctggtgagaagaata  |

---

**Table S2.** Conserved motifs of PTs in various plant species.

| <b>Different types of PTs</b>                                                                                 | <b>The first<br/>CXXXC motif</b> | <b>FARM motif<br/>(DDX<sub>2-4D</sub>)</b> | <b>The second<br/>CXXXC motif</b> | <b>SARM motif<br/>(DDXXD)</b> |
|---------------------------------------------------------------------------------------------------------------|----------------------------------|--------------------------------------------|-----------------------------------|-------------------------------|
| SmGPPS,SlGPPS,CrGPPS (subunits of homodimeric GPPSs)                                                          |                                  | DDVLD                                      |                                   | DDVLD                         |
| SmGPPS.LSU, MpGPPS.LSU, AmGPPS.LSU (large subunits of heteromeric GPPSs)                                      | CIAAC                            | DDLPCMD                                    |                                   | DDILD                         |
| SmGPPS.SSUI, MpGPPS.SSUI, AmGPPS.SSUI (small subunits of heteromeric GPPSs, type I)                           | CV/LAAC                          |                                            | CGAAC (except for SmGPPS.SSUI)    |                               |
| SmGPPS.SSUII.1, OsGPPS.SSUII.1, SmGPPS.SSUII.2, AtGPPS.SSUII.2 (small subunits of heteromeric GPPSs, type II) | CV/IAAC                          | DDLPPXD                                    | CSAV/AC                           |                               |
| SmGGPPS1, SmGGPPS2, SmGGPPS3, AtGGPPS, CsGGPPS                                                                | CLAAC                            | DDLPCMD                                    |                                   | DDXXD                         |
| SmFPPS, HbFPPS, MpFPPS, VvFPPS                                                                                |                                  | DDIMD                                      |                                   | DDYLD                         |
